# Supplementary material for: A combined theoretical and experimental approach to determine the right choice of co-ligand to impart spin crossover in Fe(ii) complexes based on 1,3,4-oxadiazole ligands
Source: Royal Society of Chemistry journal article supplement (doi:10.1039/d4dt01141d), 2024-01-01
Supplement: d4dt01141d1.pdf [file d4dt01141d1.pdf]

## Electronic Supplementary Information

### A combined theoretical and experimental approach to determine the right choice of co-ligand to impart spin crossover in Fe(II) complexes based on 1,3,4-Oxadiazole ligands

Sriram Sundaresan,<sup>a</sup> Julian Eppelsheimer,<sup>a</sup> Esha Gera,<sup>b</sup> Lukas Wiener,<sup>a</sup> Luca M Carrella, Kuduva R. Vignesh,<sup>b,\*</sup> and Eva Rentschler<sup>a,\*</sup>

<sup>a</sup>Department Chemie, Johannes-Gutenberg-Universität Mainz, Duesbergweg 10–14, 55128 Mainz, Germany.

Email: [rentschl@uni-mainz.de](mailto:rentschl@uni-mainz.de)

<sup>b</sup>Department of Chemical Sciences, Indian Institute of Science Education Research (IISER) Mohali, Sector-81, Knowledge City, S.A.S. Nagar, Mohali-140306, Punjab, India. Email: [vigneshkuduvar@iisermohali.ac.in](mailto:vigneshkuduvar@iisermohali.ac.in)

#### Contents

|                                     |    |
|-------------------------------------|----|
| 1. NMR Spectra .....                | 2  |
| 2. IR Spectra .....                 | 7  |
| 3. Crystal data: .....              | 11 |
| 4. Cyclic Voltammetry: .....        | 31 |
| 5. Solid-State Magnetic Data: ..... | 32 |
| 6. Computational details: .....     | 34 |
| 7. References .....                 | 37 |

## 1. NMR Spectra

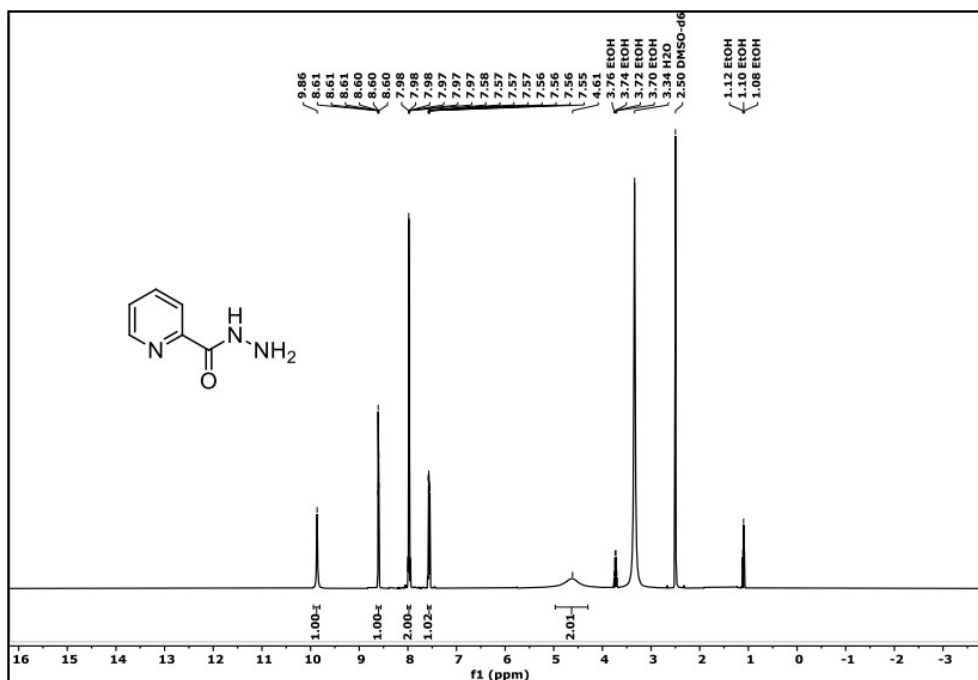

**Figure S1:** <sup>1</sup>H-NMR spectrum of Pyridine-2-carboxylic acid hydrazide in DMSO.

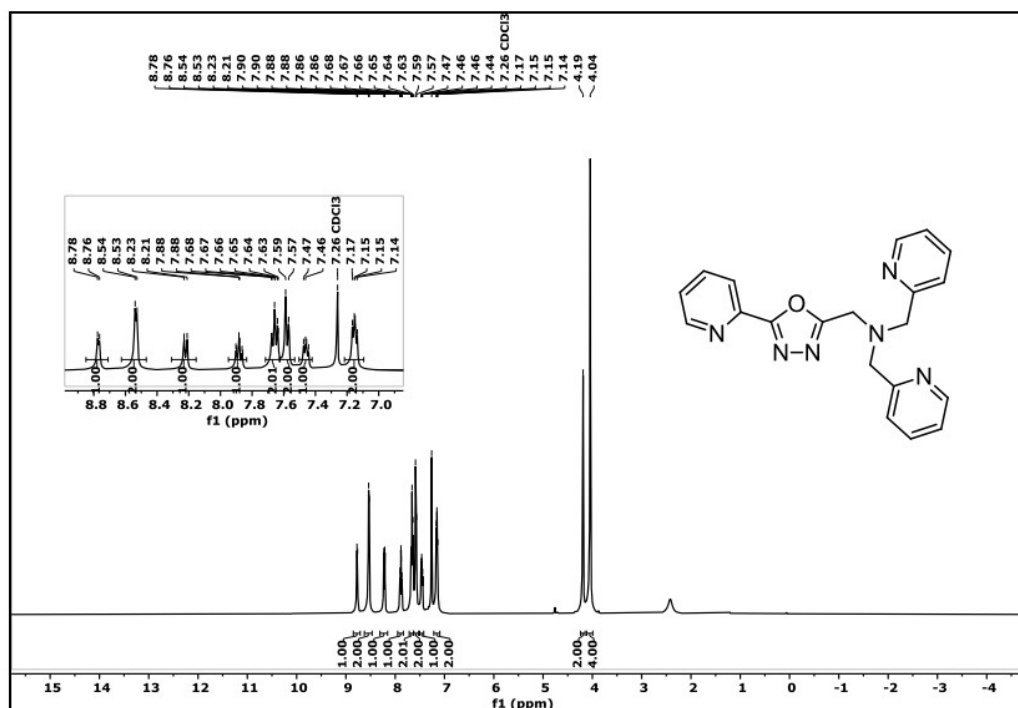

**Figure S2:** <sup>1</sup>H-NMR spectrum of 2-(2-Pyridyl)-5-[N,N-bis(2-pyridylmethyl)aminomethyl]-1,3,4-oxadiazole (**L**<sub>TetraPy-ODA</sub>) in CDCl<sub>3</sub>.

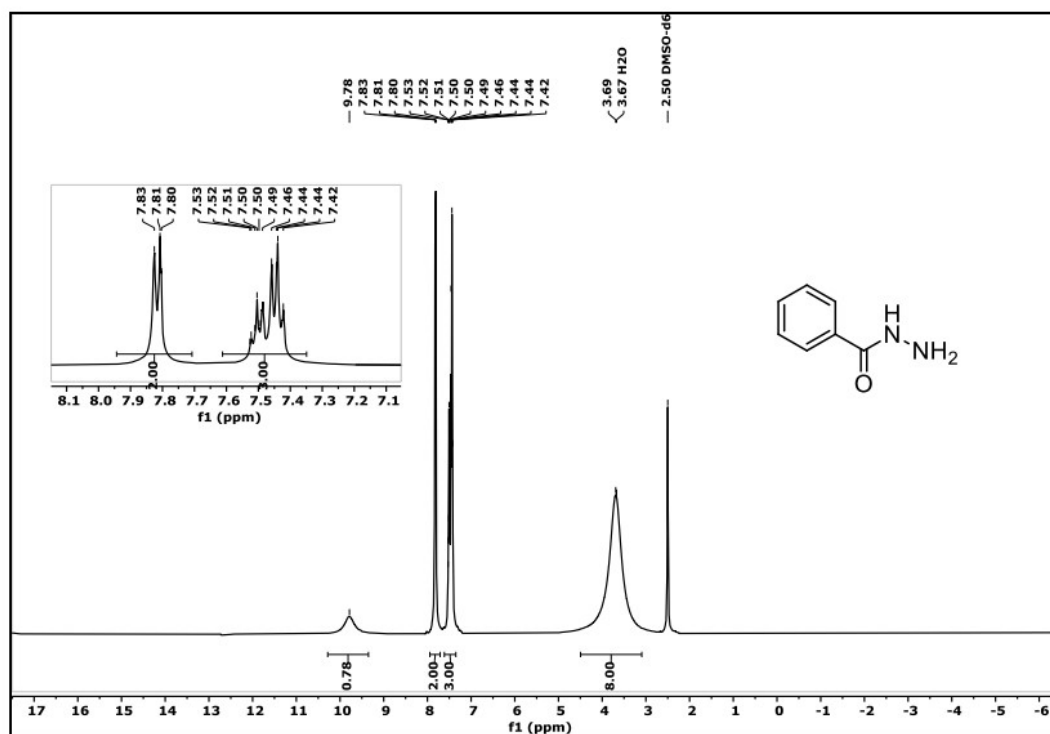

**Figure S3:** <sup>1</sup>H-NMR spectrum of Benzoic acid hydrazide in DMSO.

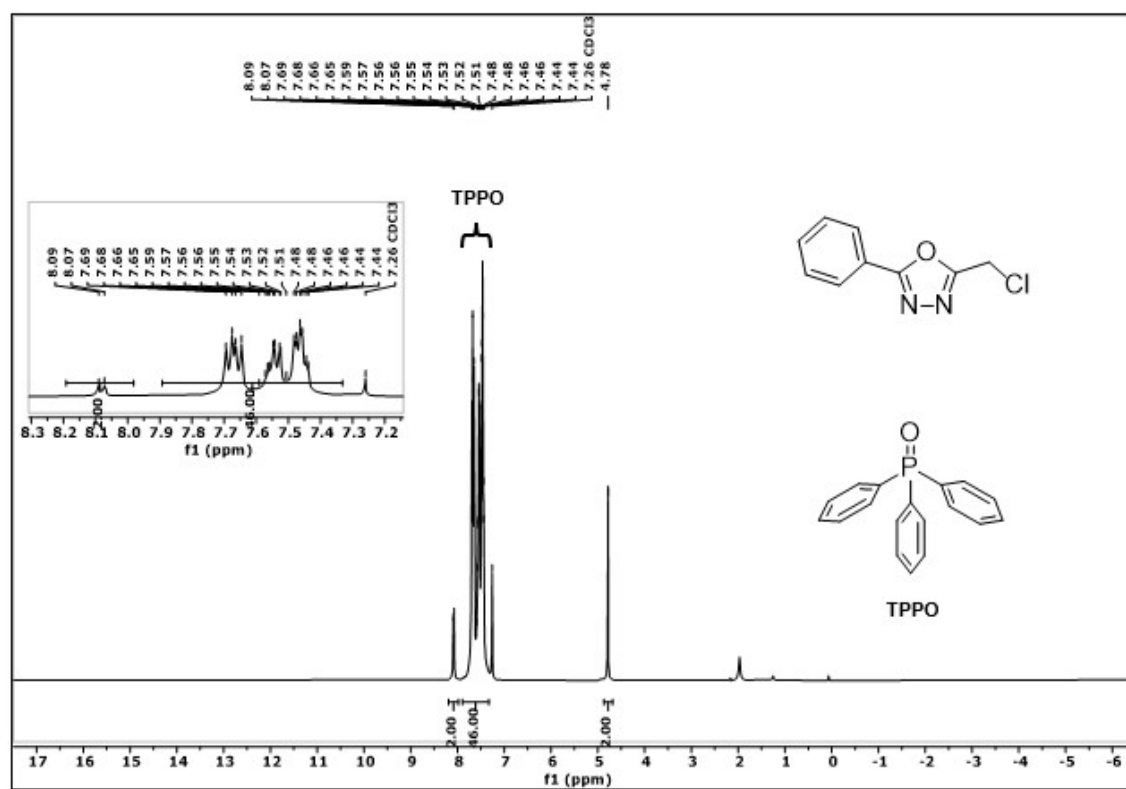

**Figure S4:** <sup>1</sup>H-NMR spectrum of 2-(Chloromethyl)-5-phenyl-1,3,4-oxadiazole and TPPO in CDCl<sub>3</sub>

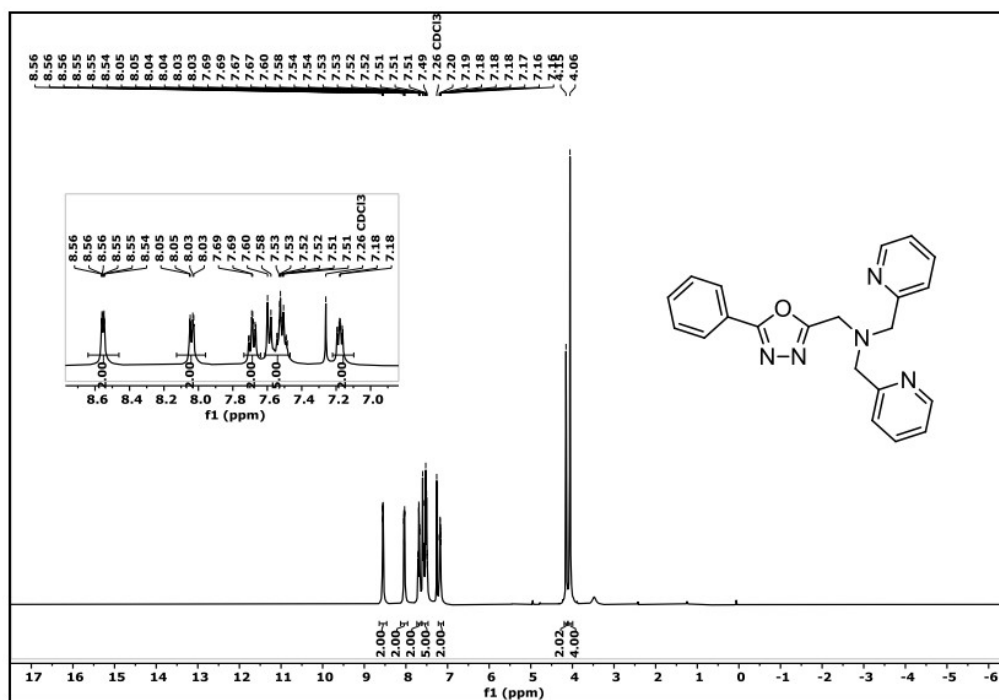

**Figure S5:** <sup>1</sup>H-NMR spectrum of 2-Phenyl-5-[N,N-bis(2-pyridylmethyl)aminomethyl]-1,3,4-oxadiazole (**L**<sub>TetraPh-ODA</sub>) in CDCl<sub>3</sub>.

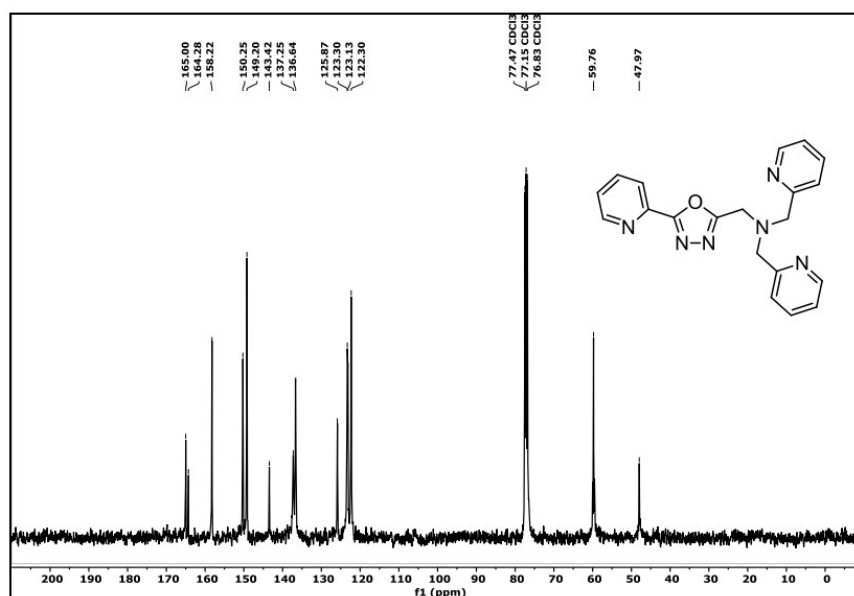

**Figure S6:** <sup>13</sup>C-NMR spectrum of 2-(2-Pyridyl)-5-[N,N-bis(2-pyridylmethyl)aminomethyl]-1,3,4-oxadiazole (**L**<sub>TetraPy-ODA</sub>) in CDCl<sub>3</sub>.

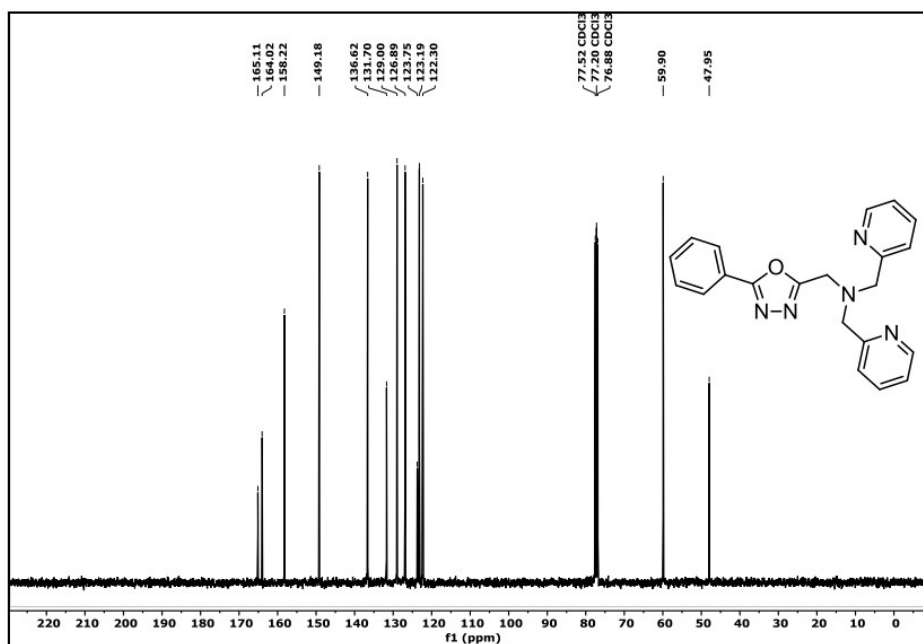

**Figure S7:** <sup>13</sup>C-NMR spectrum of 2-Phenyl-5-[N,N-bis(2-pyridylmethyl)aminomethyl]-1,3,4-oxadiazole (**L<sup>TetraPh</sup>-ODA**) in CDCl<sub>3</sub>.

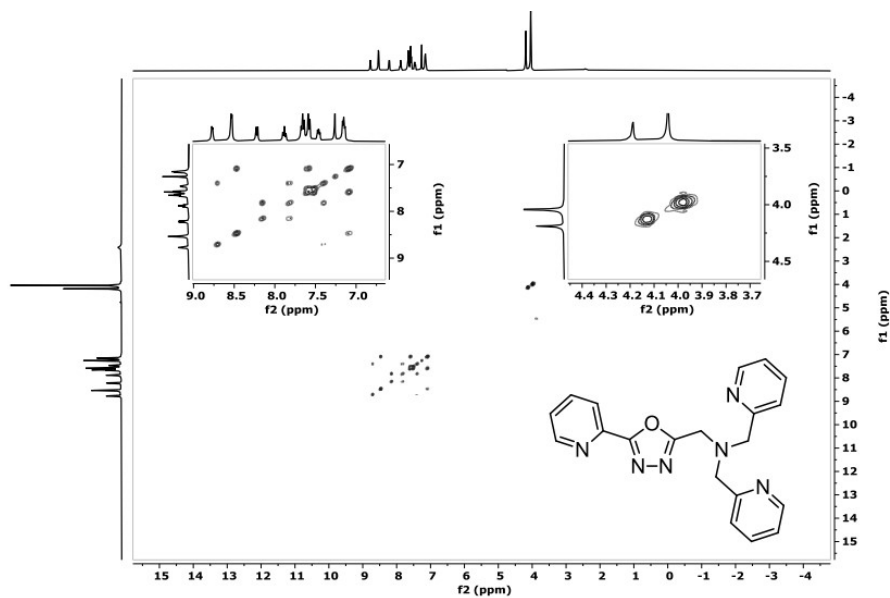

**Figure S8:** <sup>1</sup>H-<sup>1</sup>H-COSY spectrum of 2-(2-Pyridyl)-5-[N,N-bis(2-pyridylmethyl)aminomethyl]-1,3,4-oxadiazole (**L<sup>TetraPy</sup>-ODA**) in CDCl<sub>3</sub>.

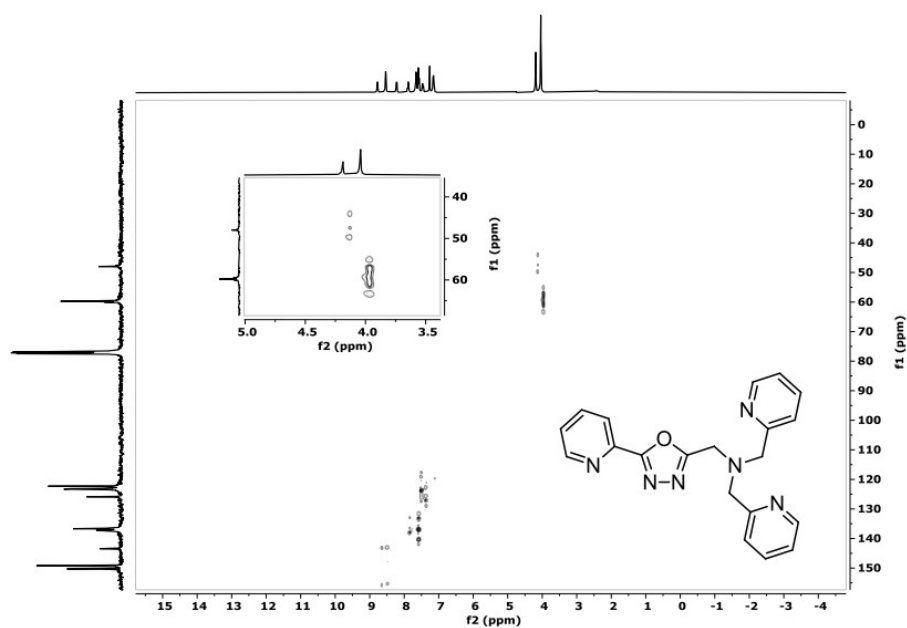

**Figure S9:**  $^1\text{H}$ - $^{13}\text{C}$ -HSQC spectrum of 2-(2-Pyridyl)-5-[N,N-bis(2-pyridylmethyl)aminomethyl]-1,3,4-oxadiazole (**L**TetraPy-ODA) in  $\text{CDCl}_3$ .

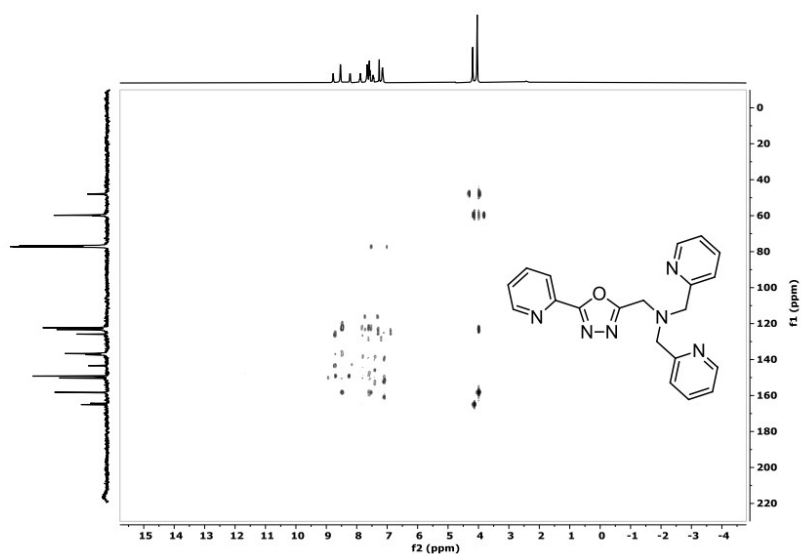

**Figure S10:**  $^1\text{H}$ - $^{13}\text{C}$ -HMBC spectrum of 2-(2-Pyridyl)-5-[N,N-bis(2-pyridylmethyl)aminomethyl]-1,3,4-oxadiazole (**L**TetraPy-ODA) in  $\text{CDCl}_3$ .

## 2. IR Spectra

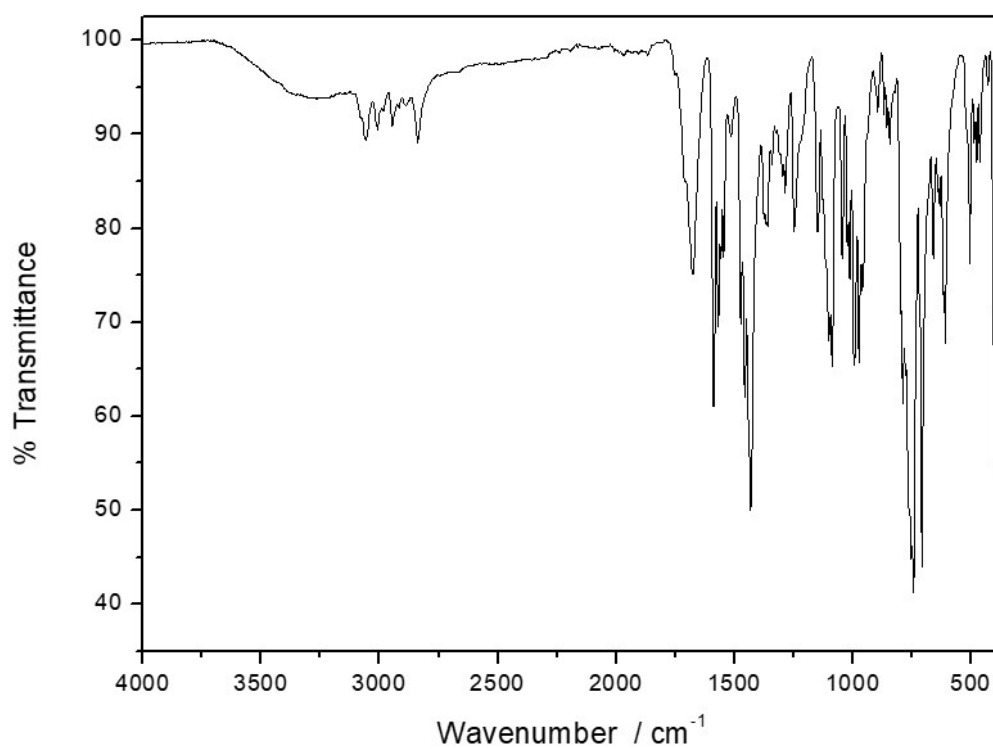

**Figure S11:** IR spectrum of 2-(2-Pyridyl)-5-[N,N-bis(2-pyridylmethyl)aminomethyl]-1,3,4- oxadiazole (**L**<sup>TetraPy-ODA</sup>).

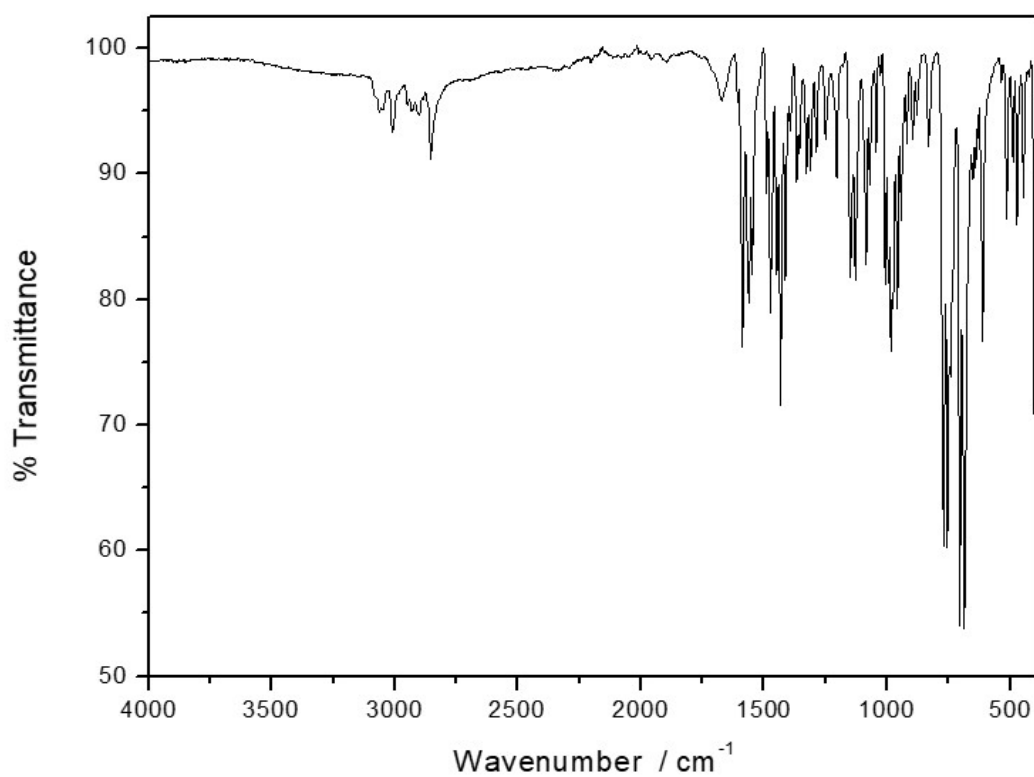

**Figure S12:** IR spectrum of 2-Phenyl-5-[N,N-bis(2-pyridylmethyl)aminomethyl]-1,3,4- oxadiazole (**L**<sup>TetraPh-ODA</sup>).

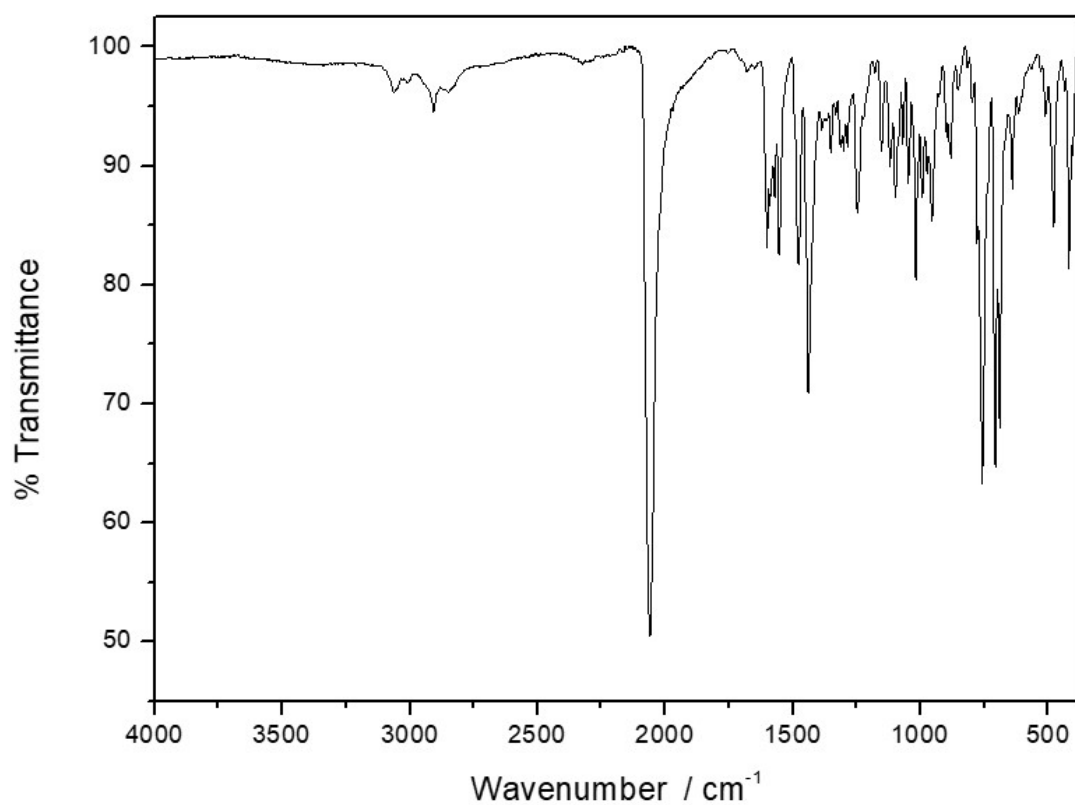

**Figure S13:** IR spectrum of [Fe<sup>II</sup>(L<sup>TetraPh-ODA</sup>)(NCS)] (**C4**).

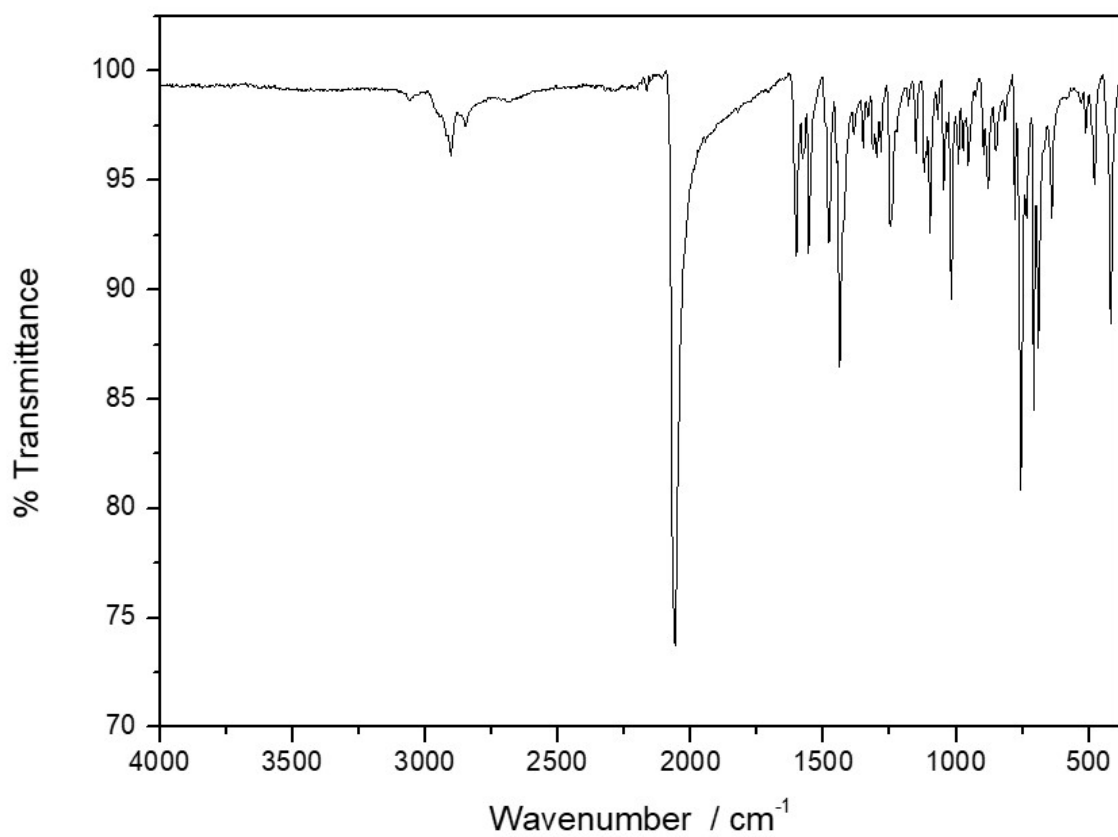

**Figure S14:** IR spectrum of [Fe<sup>II</sup>(L<sup>TetraPh-ODA</sup>)(NCSe)] (**C5**).

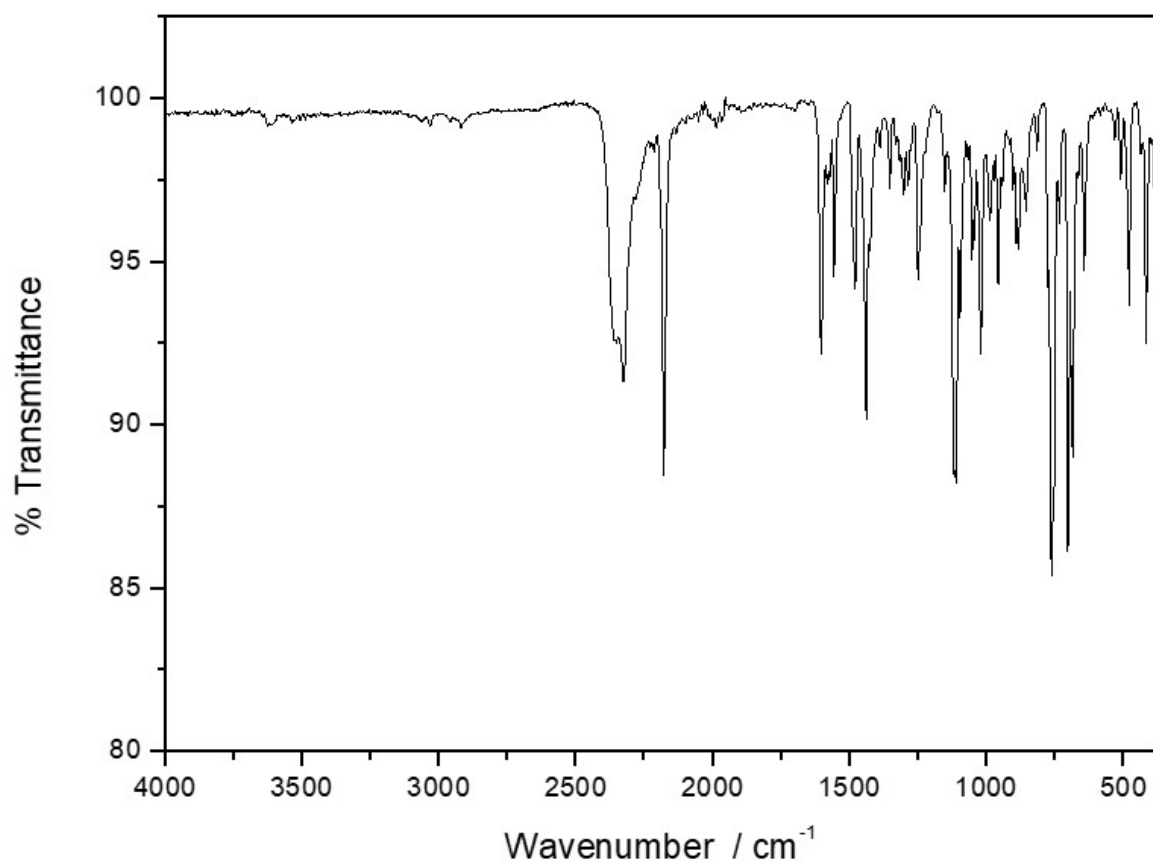

**Figure S15:** IR spectrum of  $[\text{Fe}^{\text{II}}(\text{L}^{\text{TetraPh-ODA}})(\text{NCBH}_3)_2]$  (C6).

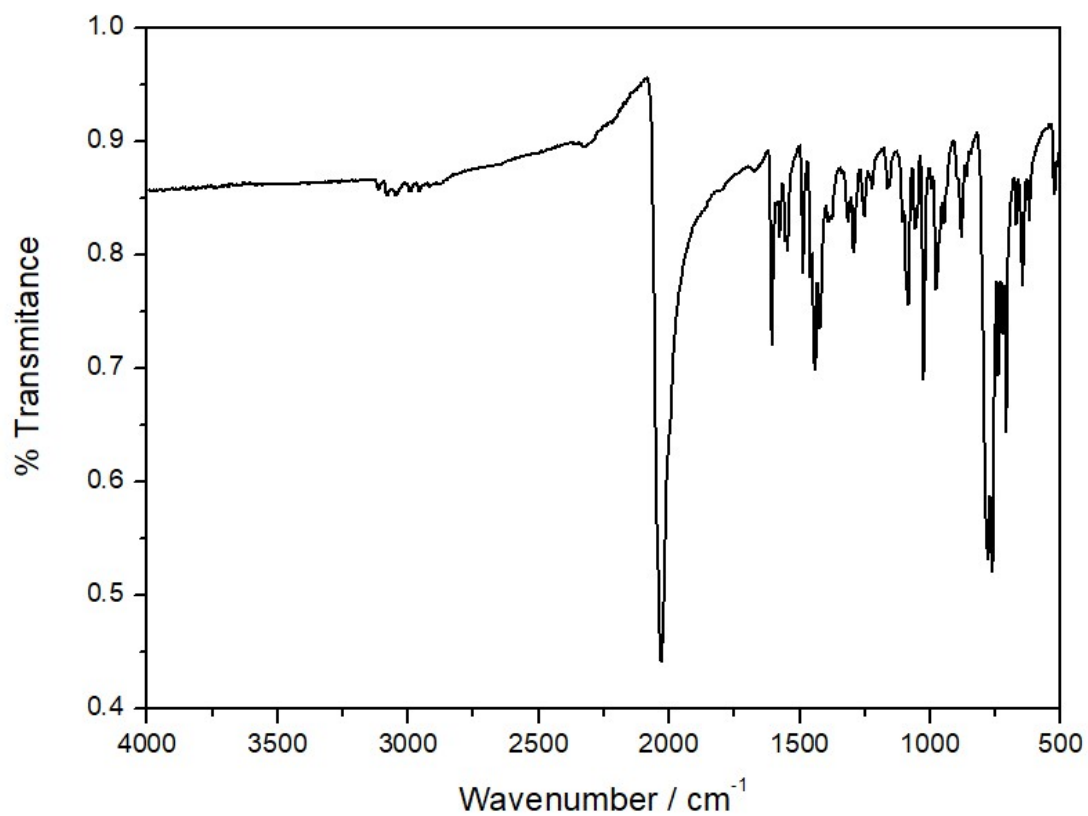

**Figure S16:** IR spectrum of  $[\text{Fe}^{\text{II}}(\text{L}^{\text{TetraPy-ODA}})(\text{NCS})_2]$  (C1).

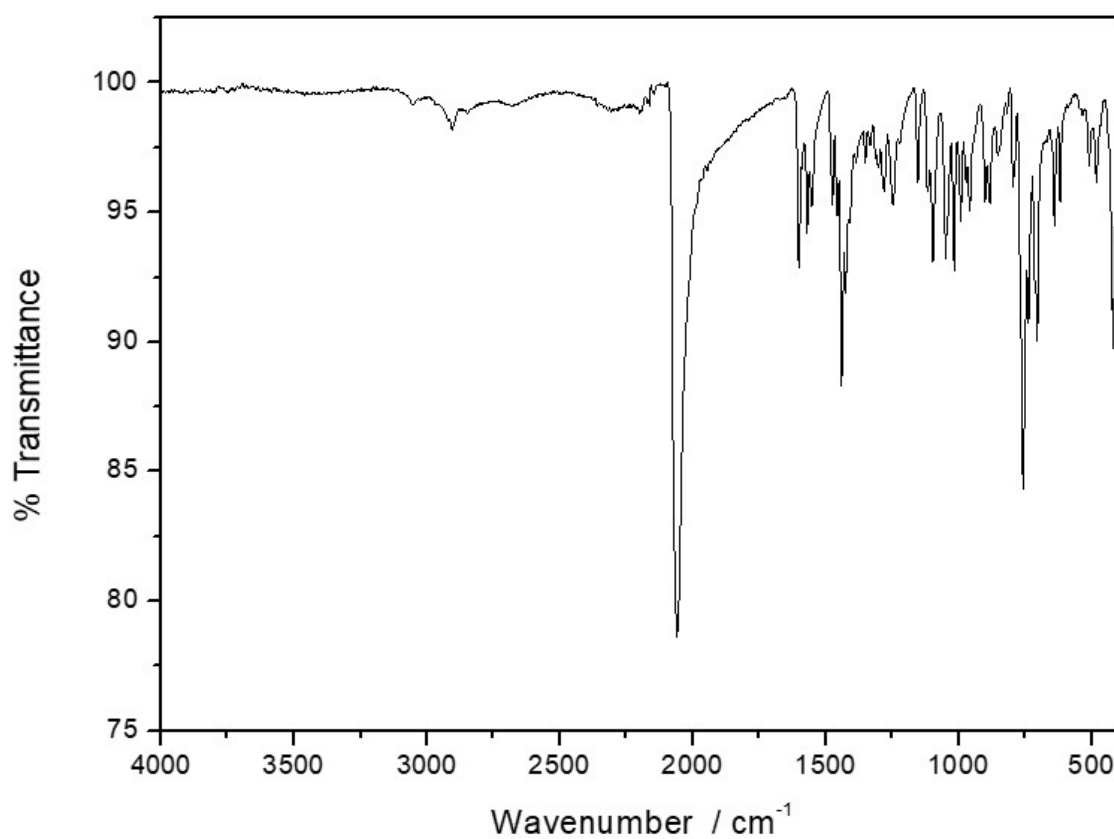

**Figure S17:** IR spectrum of  $[\text{Fe}^{\text{II}}(\text{L}^{\text{TetraPy-ODA}})(\text{NCBSe})_2]$  (C2).

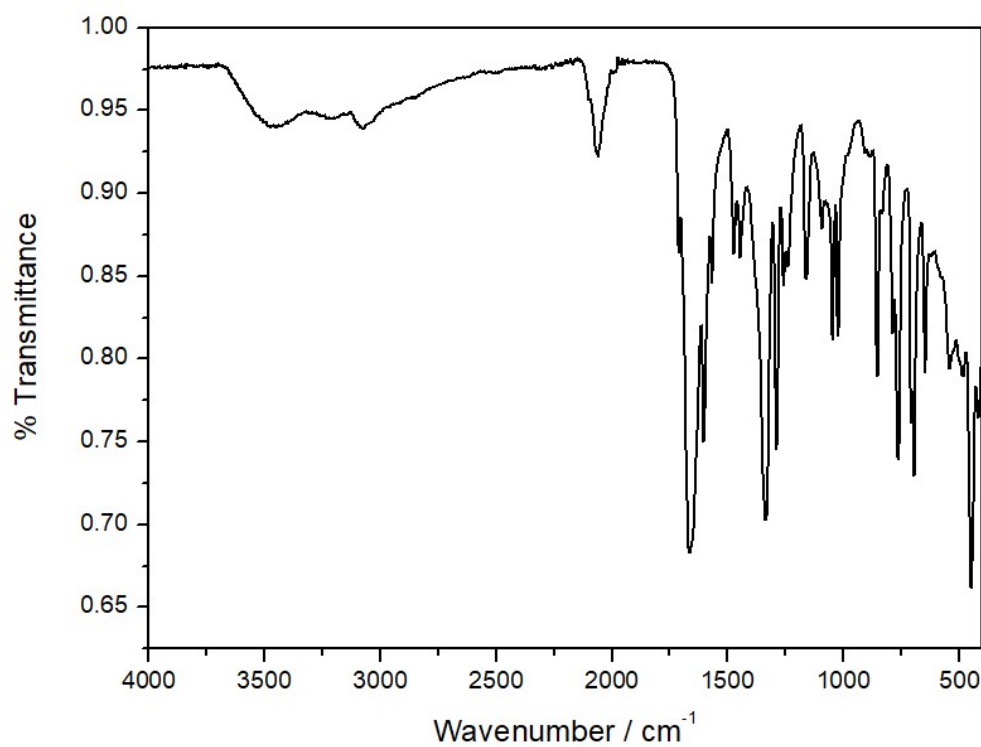

**Figure S18:** IR spectrum of  $[\text{Fe}^{\text{II}}(\text{L}^{\text{TetraPy-ODA}})(\text{NCBH}_3)_2]$  (C3).

### 3. Crystal data:

**Table S1:** X-ray crystallographic data for complex **C1** and **C2**

| Compound                                                  | <b>C1</b>                                                         | <b>C2</b>                                                          |
|-----------------------------------------------------------|-------------------------------------------------------------------|--------------------------------------------------------------------|
| Empirical formula                                         | C <sub>24</sub> H <sub>21</sub> FeN <sub>9</sub> OS <sub>2</sub>  | C <sub>28</sub> H <sub>27</sub> FeN <sub>11</sub> OSe <sub>2</sub> |
| Formula weight / g mol <sup>-1</sup>                      | 571.47                                                            | 747.37                                                             |
| Crystal size / mm                                         | 0.15 x 0.093 x 0.06                                               | 0.38 x 0.293 x 0.24                                                |
| Crystal system                                            | monoclinic                                                        | monoclinic                                                         |
| Space group                                               | <i>P2<sub>1</sub>/c</i>                                           | <i>P2<sub>1</sub>/c</i>                                            |
| Unit cell dimensions                                      |                                                                   |                                                                    |
| <i>a</i> / Å                                              | 15.4394(3)                                                        | 16.8096(5)                                                         |
| <i>b</i> / Å                                              | 11.5893(2)                                                        | 12.3242(2)                                                         |
| <i>c</i> / Å                                              | 23.9234(4)                                                        | 17.0638(5)                                                         |
| $\alpha$ / °                                              | 90                                                                | 90                                                                 |
| $\beta$ / °                                               | 141.138(2)                                                        | 112.630(2)                                                         |
| $\gamma$ / °                                              | 90                                                                | 90                                                                 |
| Volume / Å <sup>3</sup>                                   | 2685.90(11)                                                       | 3262.85(15)                                                        |
| <i>Z</i>                                                  | 4                                                                 | 4                                                                  |
| $\rho_{\text{calc.}}$ / g cm <sup>-3</sup>                | 1.413                                                             | 1.521                                                              |
| $\mu$ / mm <sup>-1</sup>                                  | 0.752                                                             | 2.733                                                              |
| <i>F</i> (000)                                            | 1176                                                              | 1496                                                               |
| Temperature / K                                           | 120                                                               | 173                                                                |
| Diffractometer                                            | STOE STADIVARI                                                    | STOE STADIVARI                                                     |
| Radiation                                                 | Mo-K $\alpha$                                                     | Mo-K $\alpha$                                                      |
| $\vartheta$ – range for data collection / °               | 2.102 < $\vartheta$ < 30.782                                      | 2.098 < $\vartheta$ < 31.109                                       |
| Index ranges                                              | -21 < <i>h</i> < 22<br>-16 < <i>k</i> < 16<br>-34 < <i>l</i> < 31 | -24 < <i>h</i> < 24<br>-17 < <i>k</i> < 17<br>-20 < <i>l</i> < 23  |
| Collected reflections                                     | 48282                                                             | 60603                                                              |
| Independent reflections                                   | 7725                                                              | 61872                                                              |
| Completeness                                              | 0.919                                                             | 0.907                                                              |
| Max. and min. transmission                                | 0.9853 and 0.6395                                                 | 0.8343 and 0.3674                                                  |
| <i>R</i> <sub>int</sub>                                   | 0.0221                                                            | 0.0422                                                             |
| <i>R</i> <sub>sigma</sub>                                 | 0.0181                                                            | 0.0381                                                             |
| Data/ restraints/ parameters                              | 7725 / 0 / 335                                                    | 9526 / 0 / 391                                                     |
| Goodness-of-fit on <i>F</i> <sup>2</sup>                  | 1.053                                                             | 0.946                                                              |
| Final <i>R</i> <sub>1</sub> [ <i>I</i> ≥ 2σ( <i>I</i> )]  | 0.0259                                                            | 0.0293                                                             |
| Final <i>wR</i> <sub>2</sub> [ <i>I</i> ≥ 2σ( <i>I</i> )] | 0.0708                                                            | 0.0645                                                             |
| Final <i>R</i> <sub>1</sub> [ <i>all data</i> ]           | 0.0336                                                            | 0.0529                                                             |
| Final <i>wR</i> <sub>2</sub> [ <i>all data</i> ]          | 0.0730                                                            | 0.0688                                                             |

**Table S2:** X-ray crystallographic data for complex **C3**. The crystallographic data collected was refined as a twin.

| Compound                                | <b>C3</b>                                                         |
|-----------------------------------------|-------------------------------------------------------------------|
| Empirical formula                       | C <sub>24</sub> H <sub>27</sub> B <sub>2</sub> FeN <sub>9</sub> O |
| Formula weight / g mol <sup>-1</sup>    | 535.01                                                            |
| Crystal size / mm                       | 0.13 x 0.097 x 0.08                                               |
| Crystal system                          | monoclinic                                                        |
| Space group                             | C2/c                                                              |
| Unit cell dimensions                    |                                                                   |
| a / Å                                   | 24.0862 (11)                                                      |
| b / Å                                   | 10.9735 (4)                                                       |
| c / Å                                   | 20.5959 (8)                                                       |
| α / °                                   | 90                                                                |
| β / °                                   | 91.577 (3)                                                        |
| γ / °                                   | 90                                                                |
| Volume / Å <sup>3</sup>                 | 5441.6 (4)                                                        |
| Z                                       | 8                                                                 |
| ρ <sub>calc.</sub> / g cm <sup>-3</sup> | 1.306                                                             |
| μ / mm <sup>-1</sup>                    | 0.589                                                             |
| F(000)                                  | 2224                                                              |
| Temperature / K                         | 173                                                               |
| Diffractometer                          | STOE STADIVARI                                                    |
| Radiation                               | Mo-Kα                                                             |
| θ – range for data collection / °       |                                                                   |
| Index ranges                            | -34 < h < 34<br>-15 < k < 15<br>-29 < l < 29                      |
| Collected reflections                   | 51502                                                             |
| Independent reflections                 | 51502                                                             |
| Completeness                            |                                                                   |
| Max. and min. transmission              |                                                                   |
| R <sub>int</sub>                        |                                                                   |
| R <sub>sigma</sub>                      | 0.0360                                                            |
| Data/ restraints/ parameters            | 51502/0/338                                                       |
| Goodness-of-fit on F <sup>2</sup>       | 1.036                                                             |
| Final R <sub>1</sub> [I ≥ 2σ(I)]        | 0.0626                                                            |
| Final wR <sub>2</sub> [I ≥ 2σ(I)]       | 0.1668                                                            |
| Final R <sub>1</sub> [all data]         | 0.0916                                                            |
| Final wR <sub>2</sub> [all data]        | 0.1924                                                            |

**Table S3:** X-ray crystallographic data for complex **C4** and **C5**

| Compound                                | <b>C4</b>                                                        | <b>C5</b>                                                             |
|-----------------------------------------|------------------------------------------------------------------|-----------------------------------------------------------------------|
| Empirical formula                       | C <sub>27</sub> H <sub>25</sub> FeN <sub>9</sub> OS <sub>2</sub> | C <sub>28</sub> H <sub>26.5</sub> FeN <sub>9.5</sub> OSe <sub>2</sub> |
| Formula weight / g mol <sup>-1</sup>    | 611.53                                                           | 725.86                                                                |
| Crystal size / mm                       | 0.32 x 0.207 x 0.11                                              | 1.1 x 0.73 x 0.29                                                     |
| Crystal system                          | monoclinic                                                       | monoclinic                                                            |
| Space group                             | C2/c                                                             | C2/c                                                                  |
| Unit cell dimensions                    |                                                                  |                                                                       |
| a / Å                                   | 30.6059(10)                                                      | 30.7836(16)                                                           |
| b / Å                                   | 11.7584(5)                                                       | 11.8309(4)                                                            |
| c / Å                                   | 17.6574(6)                                                       | 17.8246(10)                                                           |
| α / °                                   | 90                                                               | 90                                                                    |
| β / °                                   | 105.110(3)                                                       | 105.213(4)                                                            |
| γ / °                                   | 90                                                               | 90                                                                    |
| Volume / Å <sup>3</sup>                 | 6134.8(4)                                                        | 6264.2(5)                                                             |
| Z                                       | 8                                                                | 8                                                                     |
| ρ <sub>calc.</sub> / g cm <sup>-3</sup> | 1.324                                                            | 1.539                                                                 |
| μ / mm <sup>-1</sup>                    | 0.664                                                            | 2.844                                                                 |
| F(000)                                  | 2528                                                             | 2904                                                                  |
| Temperature / K                         | 173                                                              | 173                                                                   |
| Diffractionmeter                        | STOE STADIVARI                                                   | STOE STADIVARI                                                        |
| Radiation                               | Mo-Kα                                                            | Mo-Kα                                                                 |
| θ – range for data collection / °       | 1.864 < θ < 30.969                                               | 1.853 < θ < 25.998                                                    |
| Index ranges                            | -38 < h < 43<br>-16 < k < 16<br>-25 < l < 25                     | -37 < h < 37<br>-14 < k < 14<br>-21 < l < 21                          |
| Collected reflections                   | 56051                                                            | 42183                                                                 |
| Independent reflections                 | 8963                                                             | 6163                                                                  |
| Completeness                            | 0.919                                                            | 1.000                                                                 |
| Max. and min. transmission              | 0.9852 and 0.2527                                                | 0.8170 and 0.1557                                                     |
| R <sub>int</sub>                        | 0.0282                                                           | 0.0989                                                                |
| R <sub>sigma</sub>                      | 0.0266                                                           | 0.0579                                                                |
| Data/ restraints/ parameters            | 8963 / 18 / 414                                                  | 6163 / 36 / 387                                                       |
| Goodness-of-fit on F <sup>2</sup>       | 1.028                                                            | 0.969                                                                 |
| Final R <sub>1</sub> [I ≥ 2σ(I)]        | 0.0302                                                           | 0.0644                                                                |
| Final wR <sub>2</sub> [I ≥ 2σ(I)]       | 0.0820                                                           | 0.1627                                                                |
| Final R <sub>1</sub> [all data]         | 0.0415                                                           | 0.0813                                                                |
| Final wR <sub>2</sub> [all data]        | 0.0848                                                           | 0.1712                                                                |

**Table S4:** X-ray crystallographic data for complex **C6**

| Compound                                | <b>C6 at 120 K</b>                                                | <b>C6 at 240 K</b>                                                |
|-----------------------------------------|-------------------------------------------------------------------|-------------------------------------------------------------------|
| Empirical formula                       | C <sub>25</sub> H <sub>28</sub> B <sub>2</sub> FeN <sub>8</sub> O | C <sub>25</sub> H <sub>28</sub> B <sub>2</sub> FeN <sub>8</sub> O |
| Formula weight / g mol <sup>-1</sup>    | 534.02                                                            | 534.02                                                            |
| Crystal size / mm                       | 0.7 x 0.5 x 0.2                                                   | 0.7 x 0.5 x 0.2                                                   |
| Crystal system                          | monoclinic                                                        | monoclinic                                                        |
| Space group                             | C2/c                                                              | C2/c                                                              |
| Unit cell dimensions                    |                                                                   |                                                                   |
| a / Å                                   | 22.9994(7)                                                        | 23.819(2)                                                         |
| b / Å                                   | 10.7119(2)                                                        | 11.1057(7)                                                        |
| c / Å                                   | 20.7583(6)                                                        | 20.7090(17)                                                       |
| α / °                                   | 90                                                                | 90                                                                |
| β / °                                   | 91.282(2)                                                         | 91.611(7)                                                         |
| γ / °                                   | 90                                                                | 90                                                                |
| Volume / Å <sup>3</sup>                 | 5112.9(2)                                                         | 5476.0(7)                                                         |
| Z                                       | 8                                                                 | 8                                                                 |
| ρ <sub>calc.</sub> / g cm <sup>-3</sup> | 1.387                                                             | 1.295                                                             |
| μ / mm <sup>-1</sup>                    | 0.625                                                             | 0.584                                                             |
| F(000)                                  | 2224                                                              | 2224                                                              |
| Temperature / K                         | 120                                                               | 240                                                               |
| Diffractometer                          | STOE STADIVARI                                                    | STOE STADIVARI                                                    |
| Radiation                               | Mo-Kα                                                             | Mo-Kα                                                             |
| θ – range for data collection / °       | 1.963 < θ < 30.816                                                | 1.968 < θ < 30.718                                                |
| Index ranges                            | -32 < h < 32<br>-15 < k < 14<br>-29 < l < 28                      | -33 < h < 34<br>-15 < k < 15<br>-29 < l < 28                      |
| Collected reflections                   | 38963                                                             | 45829                                                             |
| Independent reflections                 | 40193                                                             | 47171                                                             |
| Completeness                            | 0.915                                                             | 0.927                                                             |
| Max. and min. transmission              | 0.9675 and 0.2137                                                 | 0.9107 and 0.1064                                                 |
| R <sub>int</sub>                        | 0.0386                                                            | 0.0391                                                            |
| R <sub>sigma</sub>                      | 0.0254                                                            | 0.0292                                                            |
| Data/ restraints/ parameters            | 7340 / 0 / 337                                                    | 7890 / 99 / 366                                                   |
| Goodness-of-fit on F <sup>2</sup>       | 1.076                                                             | 1.080                                                             |
| Final R <sub>1</sub> [I ≥ 2σ(I)]        | 0.0436                                                            | 0.0387                                                            |
| Final wR <sub>2</sub> [I ≥ 2σ(I)]       | 0.1185                                                            | 0.1116                                                            |
| Final R <sub>1</sub> [all data]         | 0.0509                                                            | 0.0580                                                            |
| Final wR <sub>2</sub> [all data]        | 0.1236                                                            | 0.1185                                                            |

**Table S5:** X-ray crystallographic data for complex **C7**

| Compound                                                  | <b>C7</b>                                                                                       |
|-----------------------------------------------------------|-------------------------------------------------------------------------------------------------|
| Empirical formula                                         | C <sub>42</sub> H <sub>42</sub> Cl <sub>4</sub> Fe <sub>2</sub> N <sub>14</sub> O <sub>22</sub> |
| Formula weight / g mol <sup>-1</sup>                      | 1348.39                                                                                         |
| Crystal size / mm                                         | 0.2 x 0.147 x 0.08                                                                              |
| Crystal system                                            | monoclinic                                                                                      |
| Space group                                               | <i>P</i> 2 <sub>1</sub> / <i>n</i>                                                              |
| Unit cell dimensions                                      |                                                                                                 |
| <i>a</i> / Å                                              | 12.5361(4)                                                                                      |
| <i>b</i> / Å                                              | 16.0432(6)                                                                                      |
| <i>c</i> / Å                                              | 13.6085(5)                                                                                      |
| $\alpha$ / °                                              | 90                                                                                              |
| $\beta$ / °                                               | 95.600(3)                                                                                       |
| $\gamma$ / °                                              | 90                                                                                              |
| Volume / Å <sup>3</sup>                                   | 2723.87(17)                                                                                     |
| <i>Z</i>                                                  | 2                                                                                               |
| $\rho_{\text{calc.}}$ / g cm <sup>-3</sup>                | 1.644                                                                                           |
| $\mu$ / mm <sup>-1</sup>                                  | 0.822                                                                                           |
| <i>F</i> (000)                                            | 1376                                                                                            |
| Temperature / K                                           | 150(2)                                                                                          |
| Diffractometer                                            | STOE STADIVARI                                                                                  |
| Radiation                                                 | Mo-K $\alpha$                                                                                   |
| $\vartheta$ – range for data collection / °               | 1.968 < $\vartheta$ < 30.803                                                                    |
| Index ranges                                              | -16 < <i>h</i> < 17<br>-21 < <i>k</i> < 22<br>-19 < <i>l</i> < 19                               |
| Collected reflections                                     | 31060                                                                                           |
| Independent reflections                                   | 7639                                                                                            |
| Completeness                                              | 0.895                                                                                           |
| Max. and min. transmission                                | 0.6837 and 0.5083                                                                               |
| <i>R</i> <sub>int</sub>                                   | 0.0246                                                                                          |
| <i>R</i> <sub>sigma</sub>                                 | 0.0307                                                                                          |
| Data/ restraints/ parameters                              | 7639 / 18 / 445                                                                                 |
| Goodness-of-fit on <i>F</i> <sup>2</sup>                  | 1.036                                                                                           |
| Final <i>R</i> <sub>1</sub> [ <i>I</i> ≥ 2σ( <i>I</i> )]  | 0.0328                                                                                          |
| Final <i>wR</i> <sub>2</sub> [ <i>I</i> ≥ 2σ( <i>I</i> )] | 0.0793                                                                                          |
| Final <i>R</i> <sub>1</sub> [ <i>all data</i> ]           | 0.0509                                                                                          |
| Final <i>wR</i> <sub>2</sub> [ <i>all data</i> ]          | 0.0842                                                                                          |

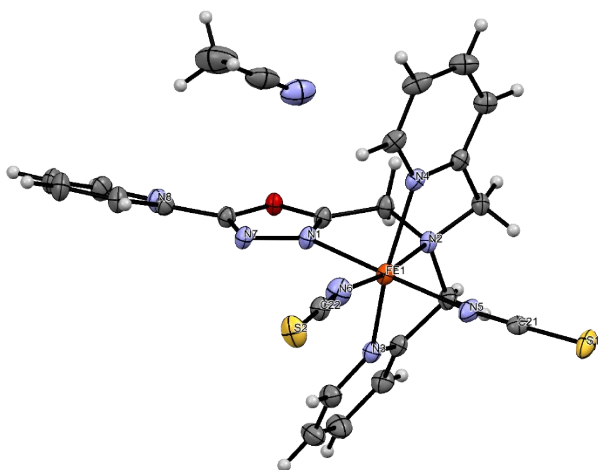

**Figure S19:** Asymmetric Unit of  $[\text{Fe}_2^{\text{II}}(\text{L}^{\text{TetraPy-ODA}})(\text{NCS})] \cdot \text{H}_2\text{O}$  (**C1**). ORTEP representation with atomic displacement parameters set to 50 % probability.

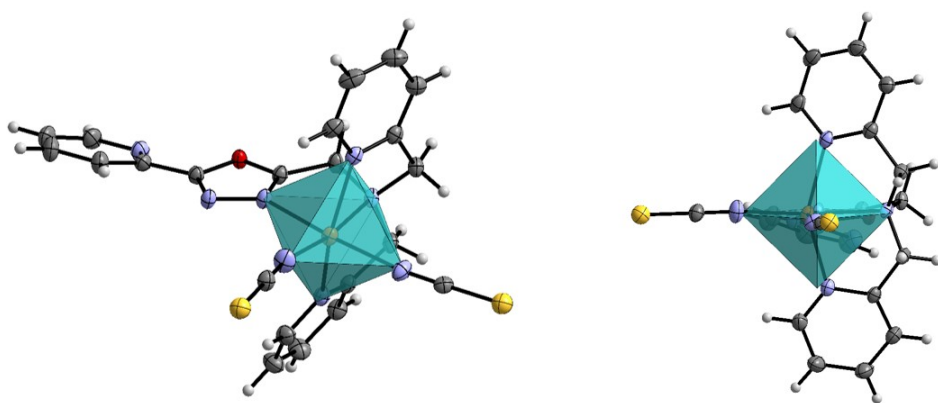

**Figure S20:** Molecular structure of  $[\text{Fe}_2^{\text{II}}(\text{L}^{\text{TetraPy-ODA}})(\text{NCS})] \cdot \text{H}_2\text{O}$  (**C1**) and its ideal coordination octahedron with front view (left) and view along the Fe-N5 axis (right), calculated with SHAPE.<sup>1</sup> Colour scheme: dark grey – C, grey – H, violet – N, red – O, yellow – S, orange – Fe. ORTEP representation with atomic displacement parameters set to 50 % probability.

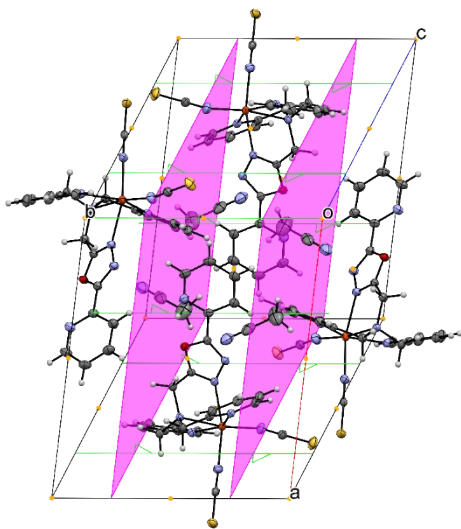

**Figure S21:** Perspective view onto the unit cell of  $[\text{Fe}_2^{\text{II}}(\text{L}^{\text{TetraPy-ODA}})(\text{NCS})] \cdot \text{H}_2\text{O}$  (**C1**) with present symmetry elements. Centers of Inversion – yellow dots, Two-fold Axis – green lines, Mirror Glide Plane – purple planes.

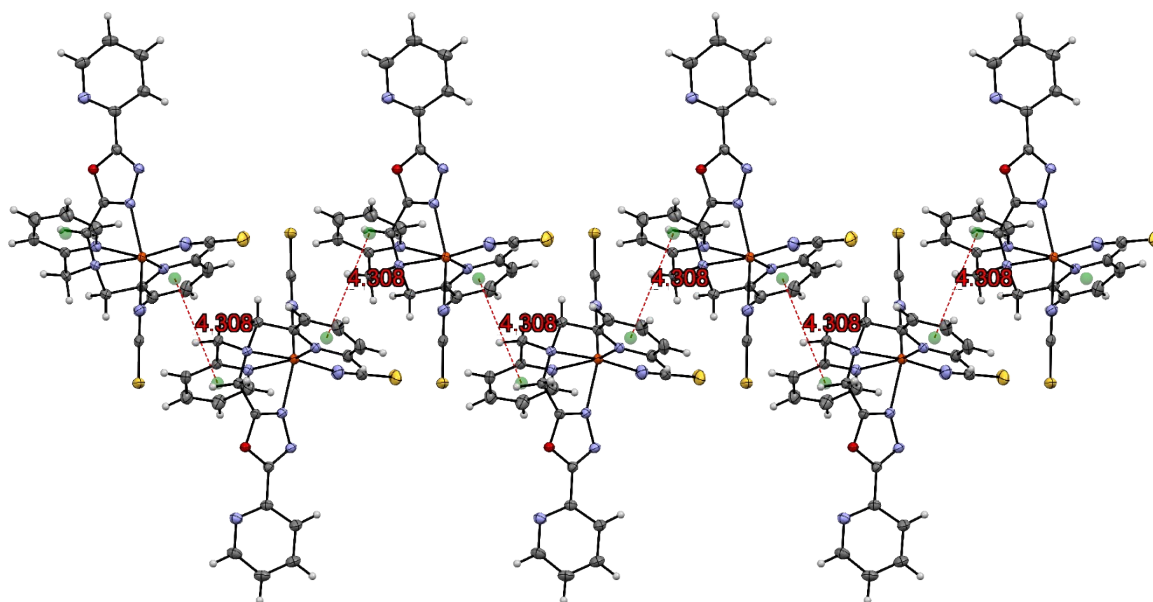

**Figure S22:** One dimensional chain formed by  $\pi$ - $\pi$  interactions in  $[\text{Fe}_2^{\text{II}}(\text{L}^{\text{TetraPy-ODA}})(\text{NCS})] \cdot \text{H}_2\text{O}$  (**C1**). Green points – centres of aromatic rings involved in  $\pi$ - $\pi$  interactions. Red dashed lines – centre-to-centre distance. Distances between the centres of two interacting aromatic rings are displayed in red. ORTEP representation with atomic displacement parameters set to 50 % probability.

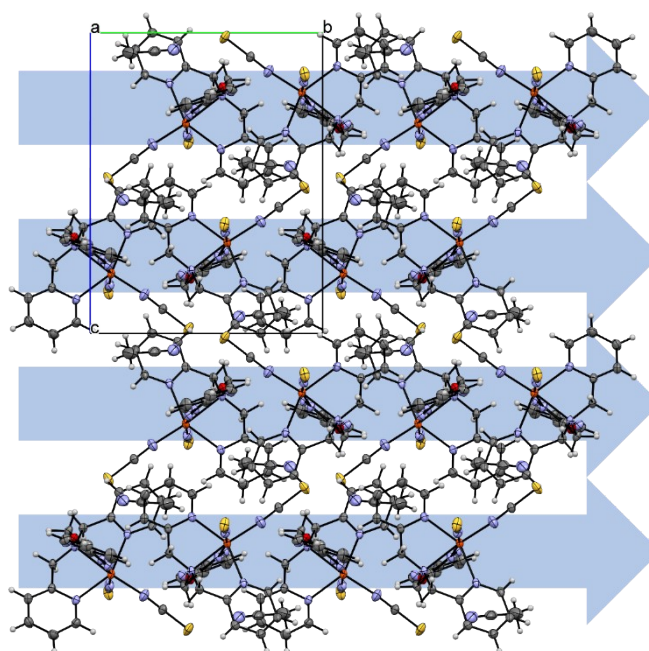

**Figure S23:** One dimensional chain formed by  $\pi$ - $\pi$  interactions in the packing of  $[\text{Fe}_2^{\text{II}}(\text{L}^{\text{TetraPy-ODA}})(\text{NCS})] \cdot \text{H}_2\text{O}$  (**C1**) with view along the a-axis. Blue arrows indicate the chains along the b-axis. ORTEP representation with atomic displacement parameters set to 50 % probability.

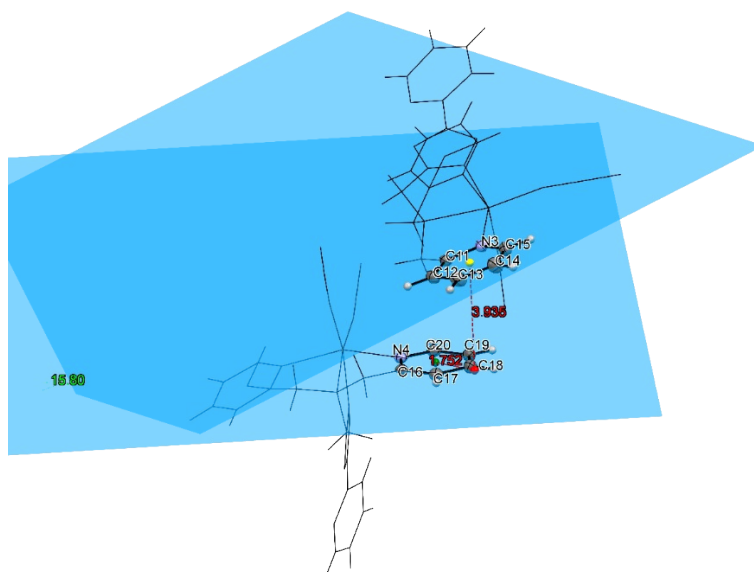

**Figure S24:**  $\pi$ - $\pi$  interaction in  $[\text{Fe}_2^{\text{II}}(\text{L}^{\text{TetraPy-ODA}})(\text{NCS})] \cdot \text{H}_2\text{O}$  (**C1**). Least-squares mean plane A is defined by N4, C16, C17, C18, C19 and C20. Plane B is defined by N3, C11, C12, C13, C14 and C15. Green point – centre of the aromatic ring in A. Yellow point – center of the aromatic ring in B. Red point – orthogonal intersection of the aromatic centre in B onto plane A. Offset  $r = 1.752 \text{ \AA}$ , interplanar distance  $d_{\text{AB}} = 3.959 \text{ \AA}$ , interplanar angle  $\theta = 15.80^\circ$ . ORTEP representation with atomic displacement parameters set to 50 % probability.

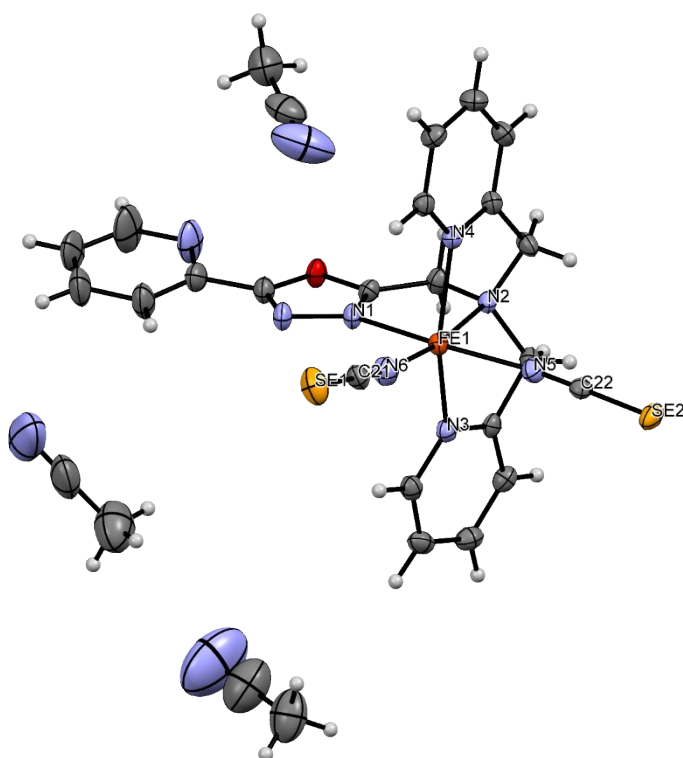

**Figure S25:** Asymmetric Unit of  $[\text{Fe}_2^{\text{II}}(\text{L}^{\text{TetraPy-ODA}})(\text{NCSe})] \cdot 0.15 \text{ CH}_3\text{CN} \cdot 1.5 \text{ H}_2\text{O}$  (**C2**). ORTEP representation with atomic displacement parameters set to 50 % probability.

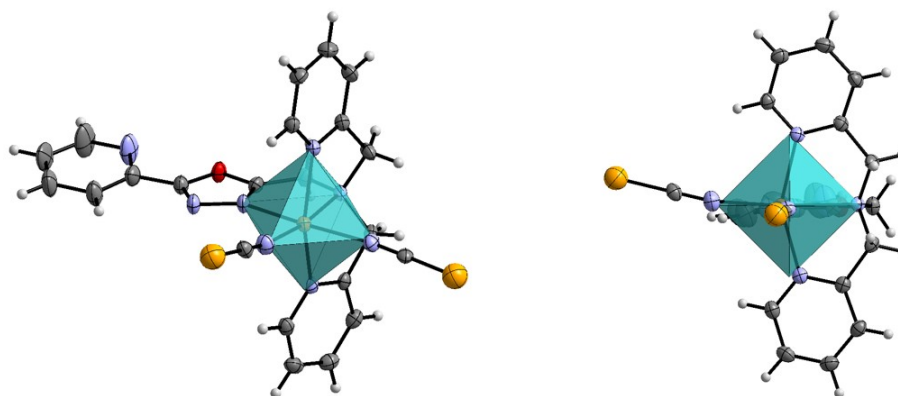

**Figure S26:** Molecular structure of  $[\text{Fe}_2^{\text{II}}(\text{L}^{\text{TetraPy-ODA}})(\text{NCSe})] \cdot 0.15 \text{ CH}_3\text{CN} \cdot 1.5 \text{ H}_2\text{O}$  (**C2**) and its ideal coordination octahedron with front view (left) and view along the Fe-N5 axis (right), calculated with SHAPE.<sup>1</sup> Colour scheme: dark grey – C, grey – H, violet – N, red – O, bright orange – Se, orange – Fe. ORTEP representation with atomic displacement parameters set to 50 % probability.

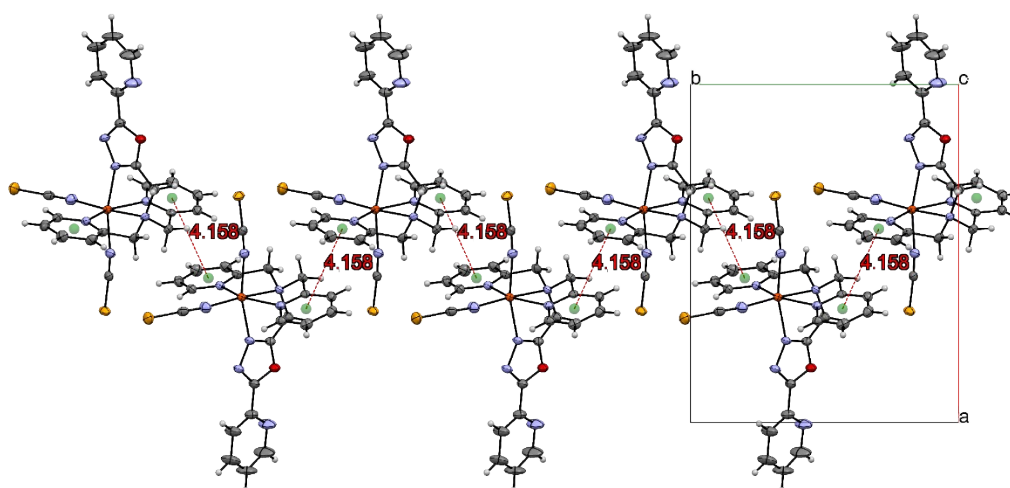

**Figure S27:** One-dimensional chain of complex molecules in  $[\text{Fe}_2^{\text{II}}(\text{L}^{\text{TetraPy-ODA}})(\text{NCSe})] \cdot 0.15 \text{ CH}_3\text{CN} \cdot 1.5 \text{ H}_2\text{O}$  (**C2**) due to intermolecular  $\pi$ - $\pi$  stacking along the b-axis. The centres of involved aromatic rings are displayed as green points. Red dashed lines and numbers represent the distance between two centres.

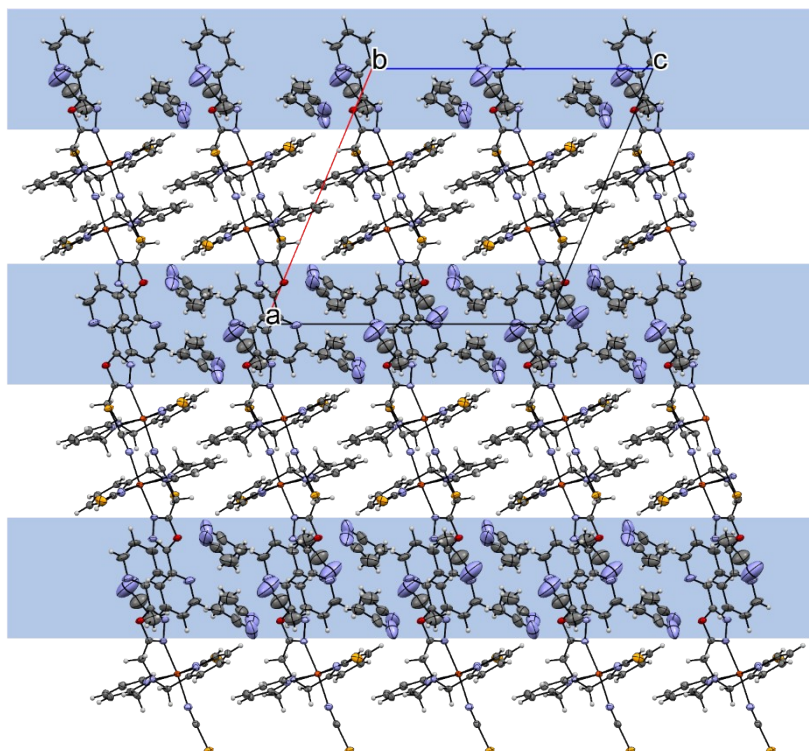

**Figure S28:** Packing of  $[\text{Fe}_2^{\text{II}}(\text{L}^{\text{TetraPy-ODA}})(\text{NCSe})] \cdot 0.15 \text{ CH}_3\text{CN} \cdot 1.5 \text{ H}_2\text{O}$  (**C2**) with view along the b-axis. Blue areas illustrate the layers of solvent molecules. ORTEP representation with atomic displacement parameters set to 50 % probability.

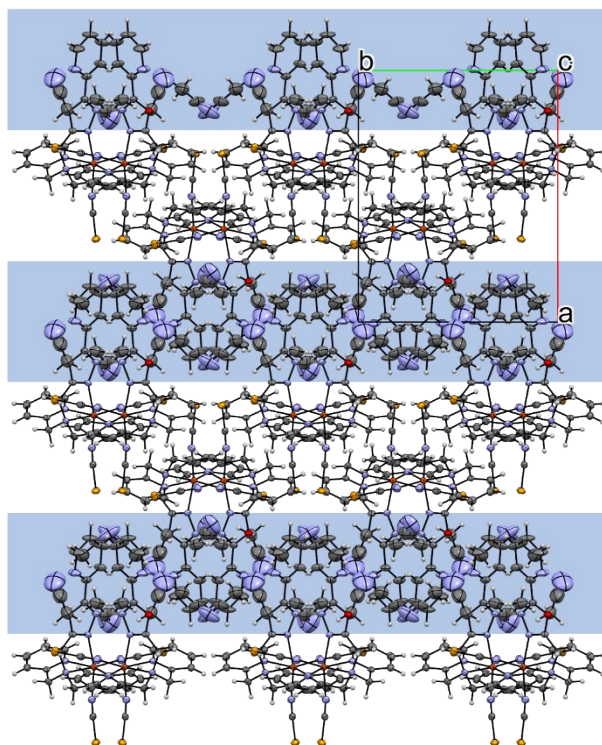

**Figure S29:** Packing of  $[\text{Fe}_2^{\text{II}}(\text{L}^{\text{TetraPy-ODA}})(\text{NCSe})] \cdot 0.15 \text{ CH}_3\text{CN} \cdot 1.5 \text{ H}_2\text{O}$  (**C2**) with view along the c-axis. Blue areas illustrate the layers of solvent molecules. ORTEP representation with atomic displacement parameters set to 50 % probability.

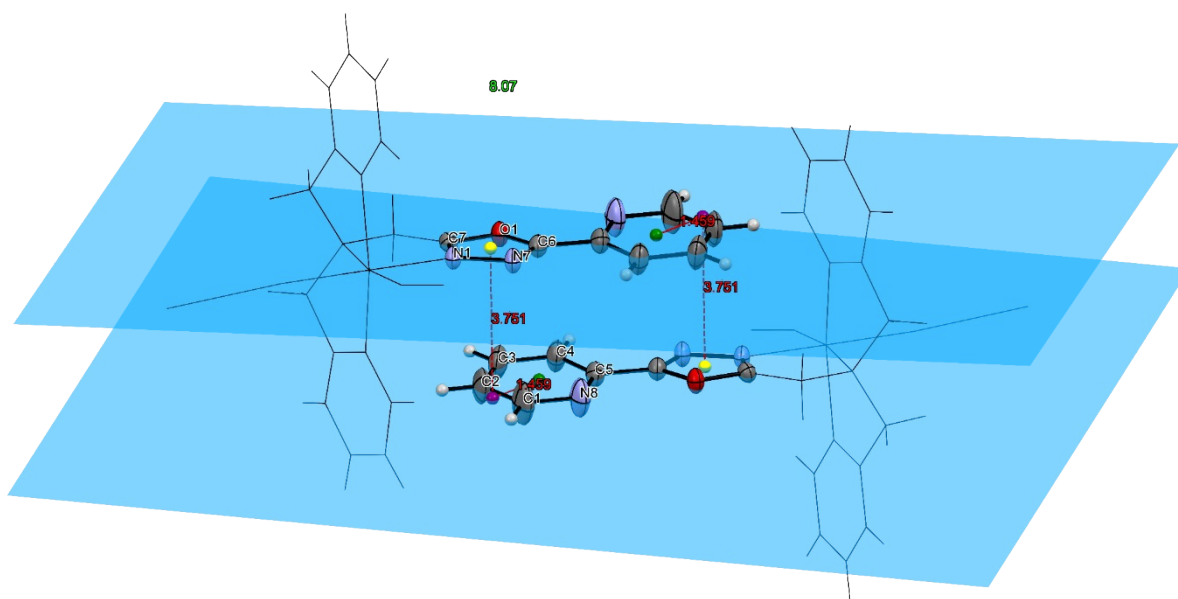

**Figure S30:**  $\pi$ - $\pi$  interaction in  $[\text{Fe}_2^{\text{II}}(\text{L}^{\text{TetraPy-ODA}})(\text{NCSe})] \cdot 0.15 \text{ CH}_3\text{CN} \cdot 1.5 \text{ H}_2\text{O}$  (**C2**). Least-squares mean plane A is defined by N8, C1, C2, C3, C4 and C5. Plane B is defined by O1, C6, N7, N1 and C7 of an adjacent molecule. Green point – centre of the aromatic ring in A. Yellow point – centre of the aromatic ring in B. Purple point – orthogonal intersection of the aromatic center in B onto plane A. Offset  $r = 1.459 \text{ \AA}$ , interplanar distance  $d_{\text{AB}} = 3.751 \text{ \AA}$ , interplanar angle  $\vartheta = 8.07^\circ$ . ORTEP representation with atomic displacement parameters set to 50 % probability.

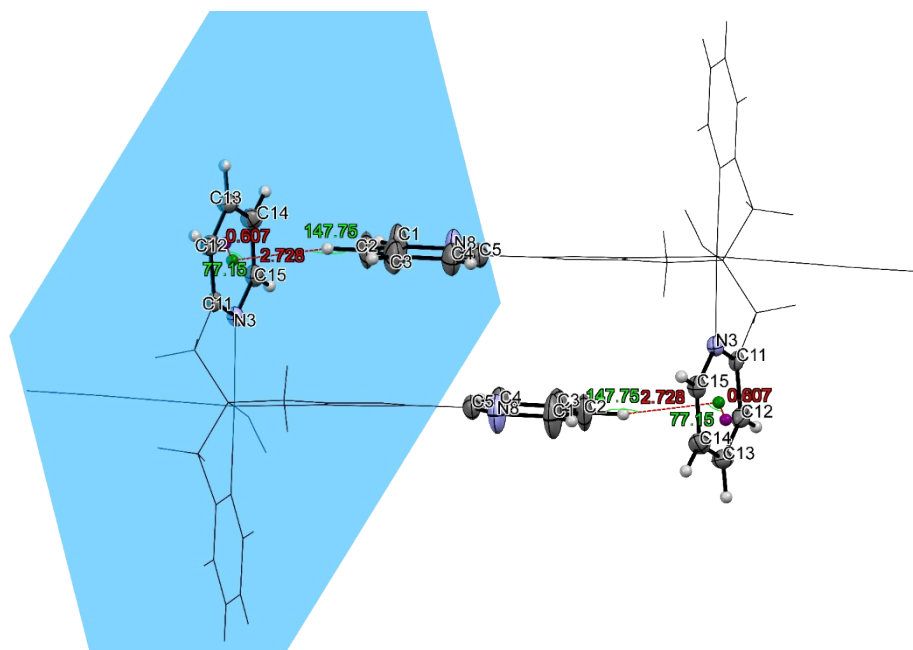

**Figure S31:** C-H  $\cdots \pi$  interaction in  $[\text{Fe}_2^{\text{II}}(\text{L}^{\text{TetraPy-ODA}})(\text{NCSe})] \cdot 0.15 \text{ CH}_3\text{CN} \cdot 1.5 \text{ H}_2\text{O}$  (**C2**). Least-squares plane A is defined by N3, C11, C12, C13, C14 and C15. Interacting C-H fragment is labelled as C2-H2. Green point – centre of the aromatic ring in A. Purple point – orthogonal intersection of H2 onto plane A. Offset  $r = 0.607 \text{ \AA}$ , interaction distance  $d_{\text{QH}} = 2.728 \text{ \AA}$ ,  $\alpha = 147.75^\circ$  and  $\beta = 77.15^\circ$ . ORTEP representation with atomic displacement parameters set to 50 % probability.

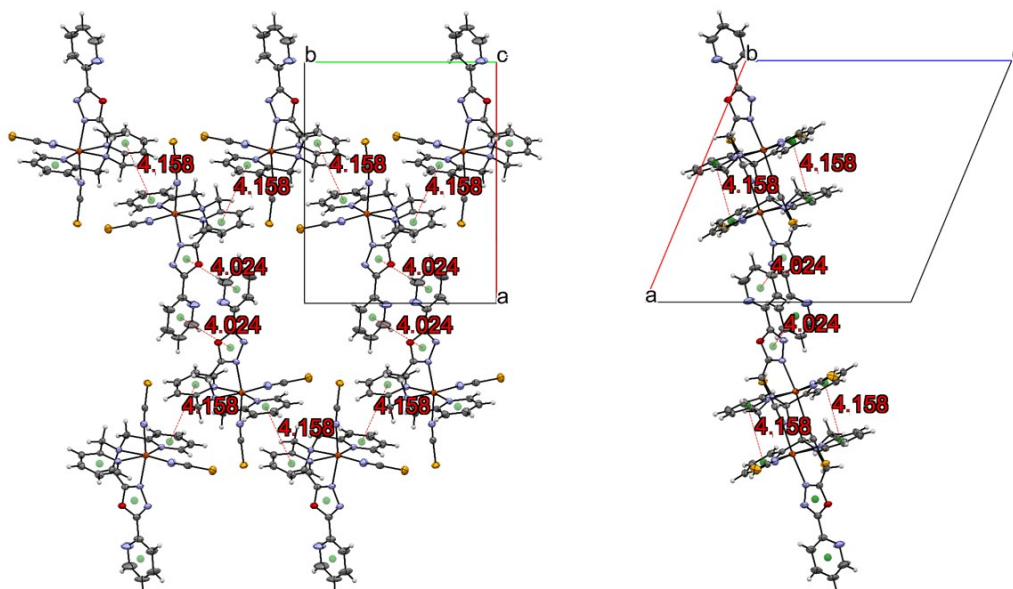

**Figure S32:** Two-dimensional network of complex molecules in  $[\text{Fe}_2^{\text{II}}(\text{L}^{\text{TetraPy-ODA}})(\text{NCSe})] \cdot 0.15 \text{CH}_3\text{CN} \cdot 1.5 \text{H}_2\text{O}$  (**C2**), due to intermolecular  $\pi$ - $\pi$  interactions with view along the c-axis (left) and b-axis (right). The centres of involved aromatic rings are displayed as green points. Distances are displayed as red dashed lines and numbers. Solvent molecules are omitted for better vision.

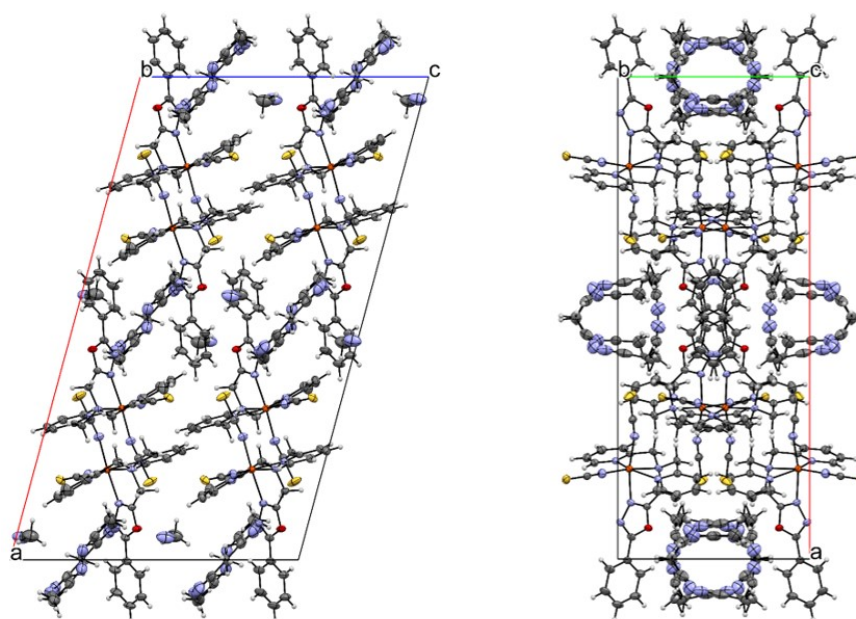

**Figure S33:** Left: Unit cell of  $[\text{Fe}_2^{\text{II}}(\text{L}^{\text{TetraPh-ODA}})(\text{NCS})] \cdot 1.75 \text{H}_2\text{O}$  (**C4**) with view along the b-axis. Right: Unit cell of  $[\text{Fe}_2^{\text{II}}(\text{L}^{\text{TetraPh-ODA}})(\text{NCS})] \cdot 1.75 \text{H}_2\text{O}$  (**C4**) with view along the c-axis. ORTEP representation with atomic displacement parameters set to 50 % probability.

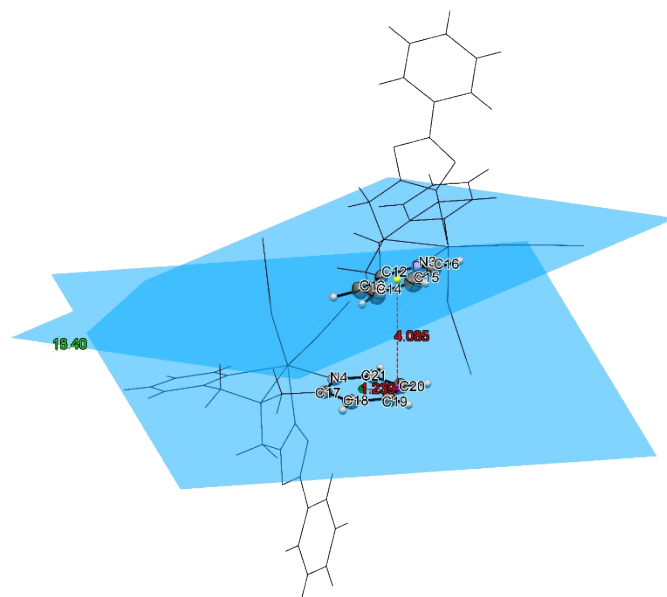

**Figure S34:**  $\pi$ - $\pi$  interaction in  $[\text{Fe}_2^{\text{II}}(\text{L}^{\text{TetraPh-ODA}})(\text{NCS})] \cdot 1.75 \text{ H}_2\text{O}$  (**C4**). Least-squares mean plane A is defined by N4, C17, C18, C19, C20 and C21. Plane B is defined by N3, C12, C13, C14, C15 and C16 of an adjacent molecule. Green point – centre of the aromatic ring in A. Yellow point – centre of the aromatic ring in B. Purple point – orthogonal intersection of the aromatic centre in B onto plane A. Offset  $r = 1.239 \text{ \AA}$ , interplanar distance  $d_{\text{AB}} = 4.085 \text{ \AA}$ , interplanar angle  $\theta = 18.40^\circ$ . ORTEP representation with atomic displacement parameters set to 50 % probability.

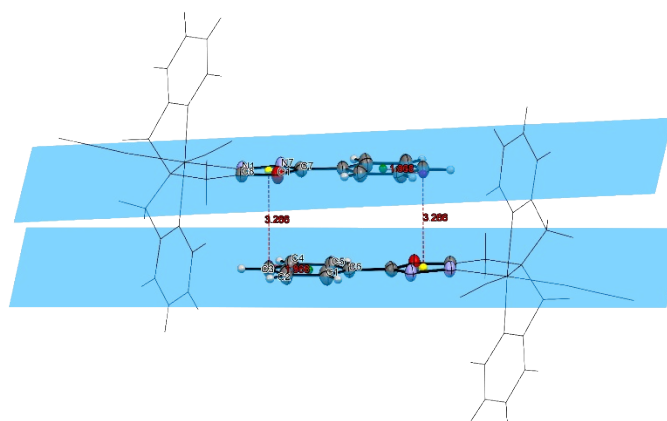

**Figure S35:**  $\pi$ - $\pi$  interaction in  $[\text{Fe}_2^{\text{II}}(\text{L}^{\text{TetraPh-ODA}})(\text{NCS})] \cdot 1.75 \text{ H}_2\text{O}$  (**C4**). Least-squares mean plane A is defined by C1, C2, C3, C4, C5 and C6. Plane B is defined by O1, C7, N7, N1 and C8 of an adjacent molecule. Green point – centre of the aromatic ring in A. Yellow point – centre of the aromatic ring in B. Purple point – orthogonal intersection of the aromatic centre in B onto plane A. Offset  $r = 1.868 \text{ \AA}$ , interplanar distance  $d_{\text{AB}} = 3.266 \text{ \AA}$ , interplanar angle  $\theta = 2.7^\circ$ . ORTEP representation with atomic displacement parameters set to 50 % probability.

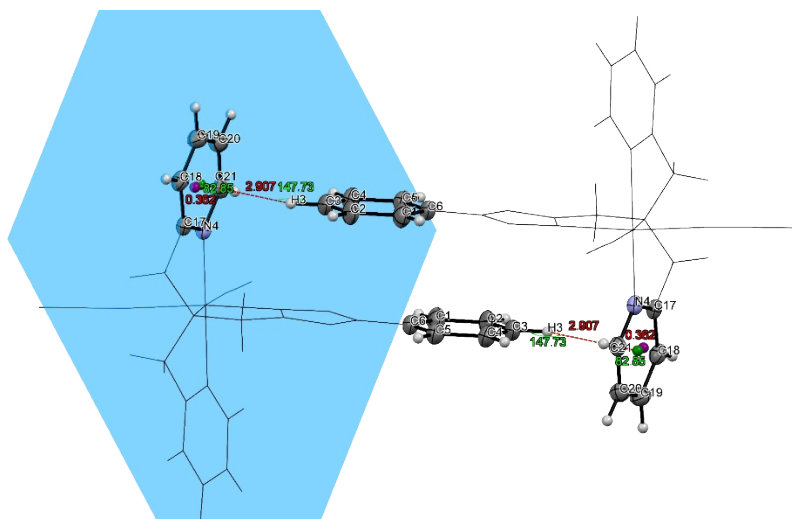

**Figure S36:** C-H ...  $\pi$  interaction in  $[\text{Fe}_2^{\text{II}}(\text{L}^{\text{TetraPh-ODA}})(\text{NCS})] \cdot 1.75 \text{ H}_2\text{O}$  (**C4**). Least-squares plane A is defined by N4, C17, C18, C19, C20 and C21. Interacting C-H fragment is labeled as C3-H3. Green point – center of the aromatic ring in A. Purple point – orthogonal intersection of H13 onto plane A. Offset  $r = 0.362 \text{ \AA}$ , interaction distance  $d_{\text{OH}} = 2.907 \text{ \AA}$ ,  $\alpha = 147.73^\circ$  and  $\beta = 82.85^\circ$ . ORTEP representation with atomic displacement parameters set to 50 % probability.

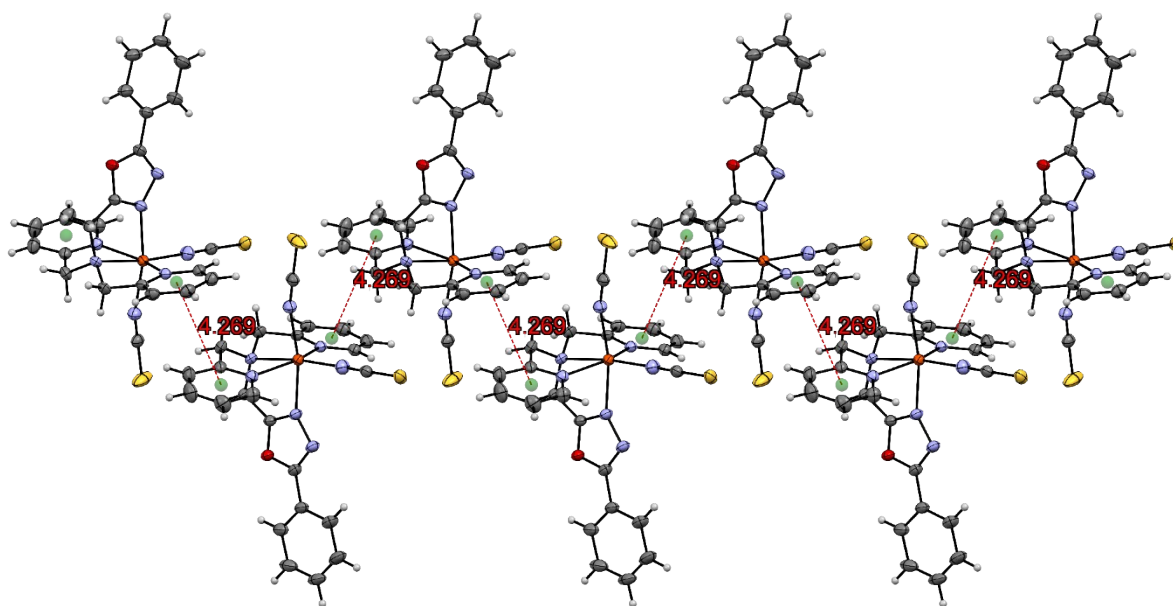

**Figure S37:** One-dimensional chain of complex molecules in  $[\text{Fe}_2^{\text{II}}(\text{L}^{\text{TetraPh-ODA}})(\text{NCS})] \cdot 1.75 \text{ H}_2\text{O}$  (**C4**) due to intermolecular  $\pi$ - $\pi$  stacking. The centres of involved aromatic rings are displayed as green points. Red dashed lines and numbers represent the distance between two centres. Colour scheme: dark grey – C, grey – H, violet – N, red – O, bright orange – Se, orange – Fe. ORTEP representation with atomic displacement parameters set to 50 % probability.

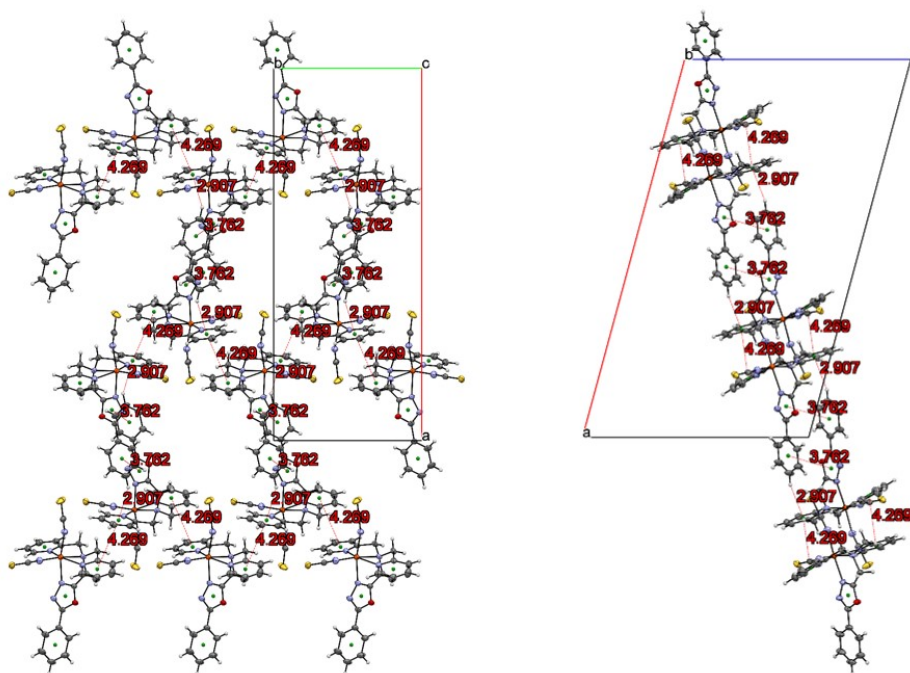

**Figure S38:** Two-dimensional network of complex molecules in  $[\text{Fe}_2^{\text{II}}(\text{L}^{\text{TetraPh-ODA}})(\text{NCS})] \cdot 1.75 \text{ H}_2\text{O}$  (**C4**) due to intermolecular  $\pi$ - $\pi$  interactions with view along the c-axis (left) and b-axis (right). The centres of involved aromatic rings are displayed as green points. Distances are displayed as red dashed lines and numbers. Solvent molecules are omitted for better vision. ORTEP representation with atomic displacement parameters set to 50 % probability.

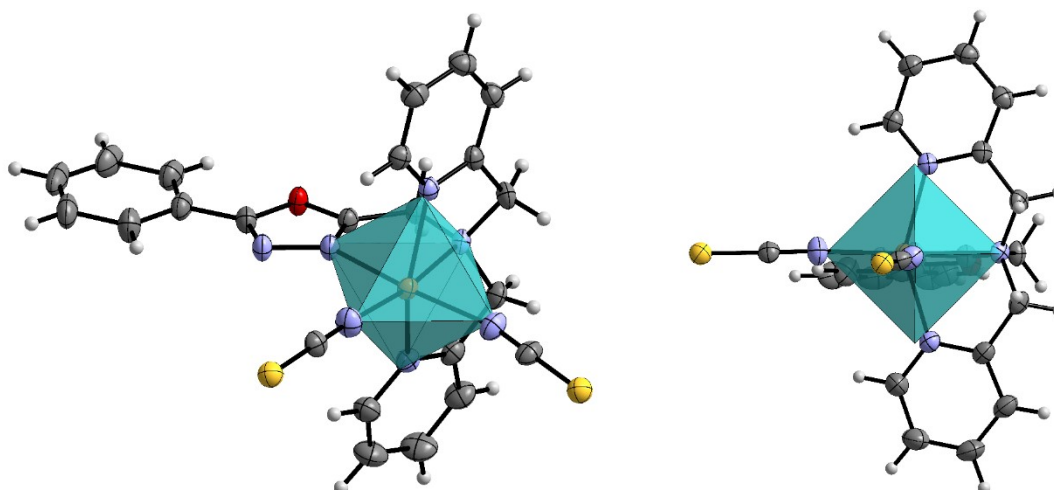

**Figure S39:** Molecular structure of  $[\text{Fe}_2^{\text{II}}(\text{L}^{\text{TetraPh-ODA}})(\text{NCS})] \cdot 1.75 \text{ H}_2\text{O}$  (**C4**) and its ideal coordination octahedron with front view (left) and view along the Fe-N5 axis (right), calculated with SHAPE.<sup>1</sup> ORTEP representation with atomic displacement parameters set to 50 % probability.

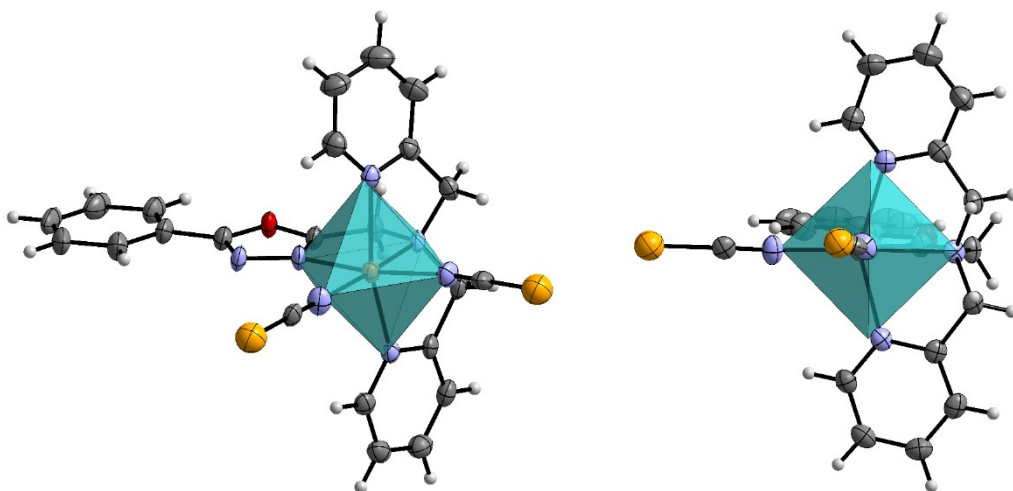

**Figure S40:** Molecular structure of  $[\text{Fe}_2^{\text{II}}(\text{L}^{\text{TetraPh-ODA}})(\text{NCSe})] \cdot 0.4\text{Et}_2\text{O} \cdot \text{H}_2\text{O}$  (**C5**) and its ideal coordination octahedron with front view (left) and view along the Fe-N5 axis (right), calculated with SHAPE.<sup>1</sup> ORTEP representation with atomic displacement parameters set to 50 % probability.

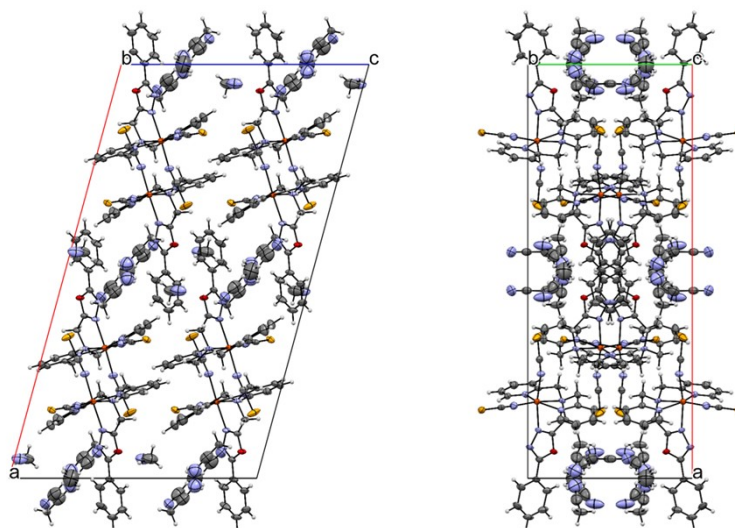

**Figure S41:** Unit cell of  $[\text{Fe}_2^{\text{II}}(\text{L}^{\text{TetraPh-ODA}})(\text{NCSe})] \cdot 0.4\text{Et}_2\text{O} \cdot \text{H}_2\text{O}$  (**C5**) with view along the b-axis (left) and view along the c-axis (right). ORTEP representation with atomic displacement parameters set to 50 % probability.

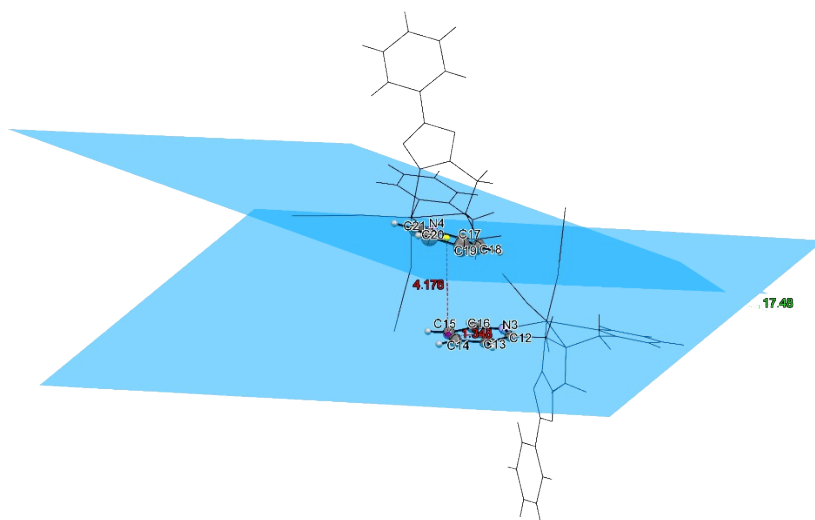

**Figure S42:**  $\pi$ - $\pi$  interaction in  $[\text{Fe}_2^{\text{II}}(\text{L}^{\text{TetraPh-ODA}})(\text{NCSe})] \cdot 0.4\text{Et}_2\text{O} \cdot \text{H}_2\text{O}$  (**C5**). Least-squares mean plane A is defined by N3, C12, C13, C14, C15 and C16. Plane B is defined by N4, C17, C18, C19, C20 and C21 of an adjacent molecule. Green point – centre of the aromatic ring in A. Yellow point – centre of the aromatic ring in B. Purple point – orthogonal intersection of the aromatic centre in B onto plane A. Offset  $r = 1.348 \text{ \AA}$ , interplanar distance  $d_{\text{AB}} = 4.176 \text{ \AA}$ , interplanar angle  $\vartheta = 17.48^\circ$ . ORTEP representation with atomic displacement parameters set to 50 % probability.

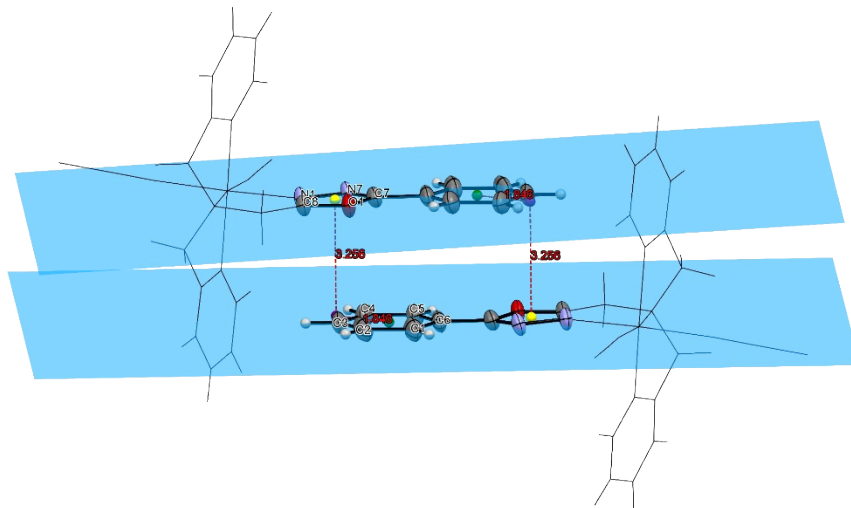

**Figure S43:**  $\pi$ - $\pi$  interaction in  $[\text{Fe}_2^{\text{II}}(\text{L}^{\text{TetraPh-ODA}})(\text{NCSe})] \cdot 0.4\text{Et}_2\text{O} \cdot \text{H}_2\text{O}$  (**C5**). Least-squares mean plane A is defined by C1, C2, C3, C4, C5 and C6. Plane B is defined by O1, C7, N7, N1 and C8 of an adjacent molecule. Green point – center of the aromatic ring in A. Yellow point – center of the aromatic ring in B. Purple point – orthogonal intersection of the aromatic center in B onto plane A. Offset  $r = 1.846 \text{ \AA}$ , interplanar distance  $d_{\text{AB}} = 3.256 \text{ \AA}$ , interplanar angle  $\vartheta = 3^\circ$ . ORTEP representation with atomic displacement parameters set to 50 % probability.

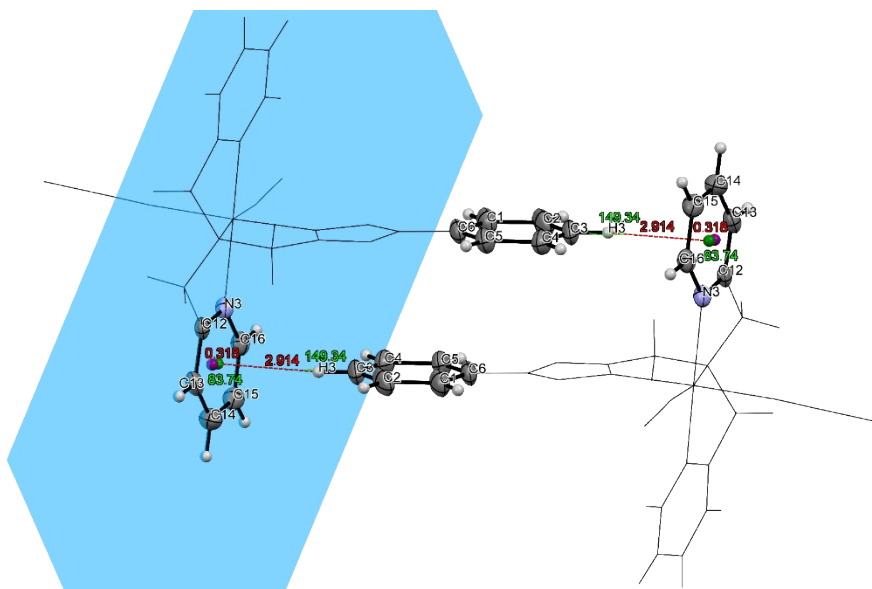

**Figure S44:** C-H  $\cdots \pi$  interaction in  $[\text{Fe}_2^{\text{II}}(\text{L}^{\text{TetraPh-ODA}})(\text{NCSe})] \cdot 0.4\text{Et}_2\text{O} \cdot \text{H}_2\text{O}$  (**C5**). Least-squares plane A is defined by N3, C12, C13, C14, C15 and C16. Interacting C-H fragment is labeled as C3-H3. Green point – center of the aromatic ring in A. Purple point – orthogonal intersection of H13 onto plane A. Offset  $r = 0.318 \text{ \AA}$ , interaction distance  $d_{\text{QH}} = 2.914 \text{ \AA}$ ,  $\alpha = 149.34^\circ$  and  $\beta = 83.74^\circ$ . ORTEP representation with atomic displacement parameters set to 50 % probability.

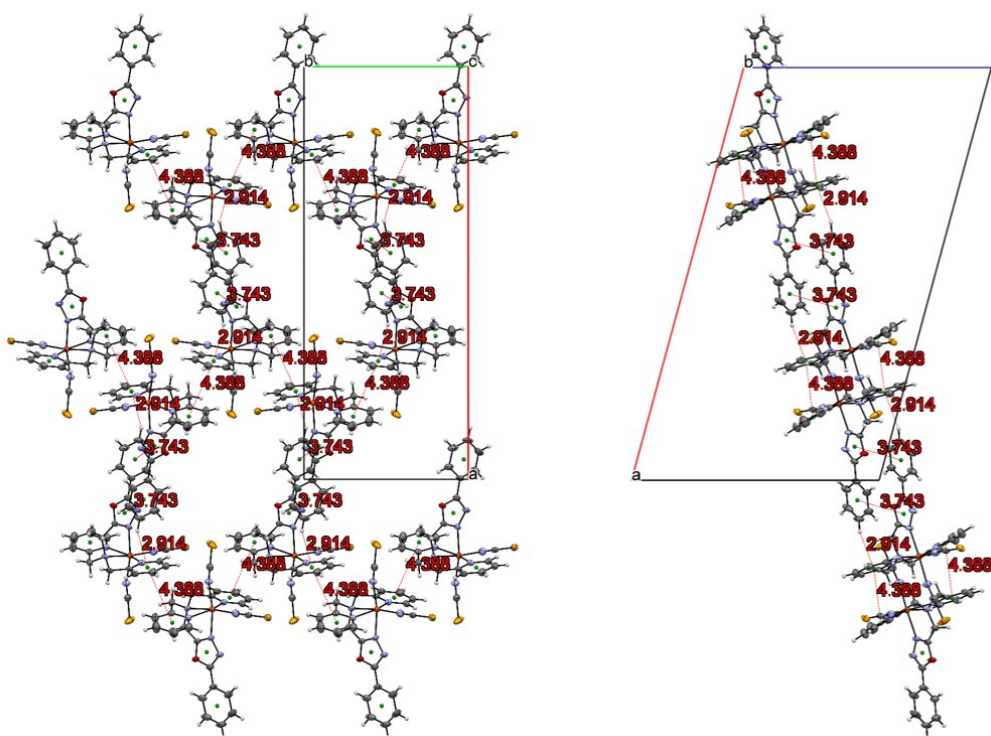

**Figure S45:** Two-dimensional network of complex molecules in  $[\text{Fe}_2^{\text{II}}(\text{L}^{\text{TetraPh-ODA}})(\text{NCSe})] \cdot 0.4\text{Et}_2\text{O} \cdot \text{H}_2\text{O}$  (**C5**) due to intermolecular  $\pi$ - $\pi$  interactions with view along the c-axis (left) and b-axis (right). The centres of involved aromatic rings are displayed as green points. Distances are displayed as red dashed lines and numbers. Solvent molecules are omitted for better vision. ORTEP representation with atomic displacement parameters set to 50 % probability.

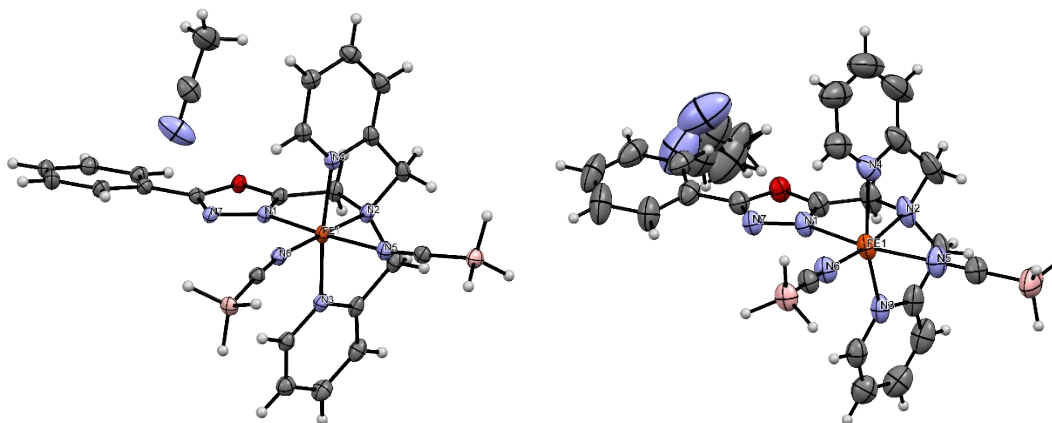

**Figure S46:** Asymmetric Unit of  $[\text{Fe}_2^{\text{II}}(\text{L}^{\text{TetraPh-ODA}})(\text{NCBH}_3)] \cdot 1.5 \text{H}_2\text{O}$  (**C6**) (120 K(left); 240 K (right)). ORTEP representation with atomic displacement parameters set to 50 % probability.

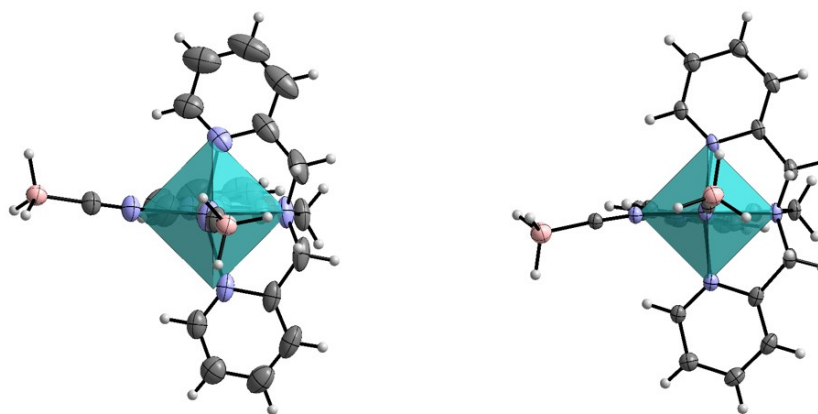

**Figure S47:** Molecular structure of  $[\text{Fe}_2^{\text{II}}(\text{L}^{\text{TetraPh-ODA}})(\text{NCBH}_3)] \cdot 1.5 \text{H}_2\text{O}$  (C6) and its ideal coordination octahedron with view along the Fe-N5 axis at 240 K (left) and 120 K (right), calculated with SHAPE.<sup>1</sup> ORTEP representation with atomic displacement parameters set to 50 % probability.

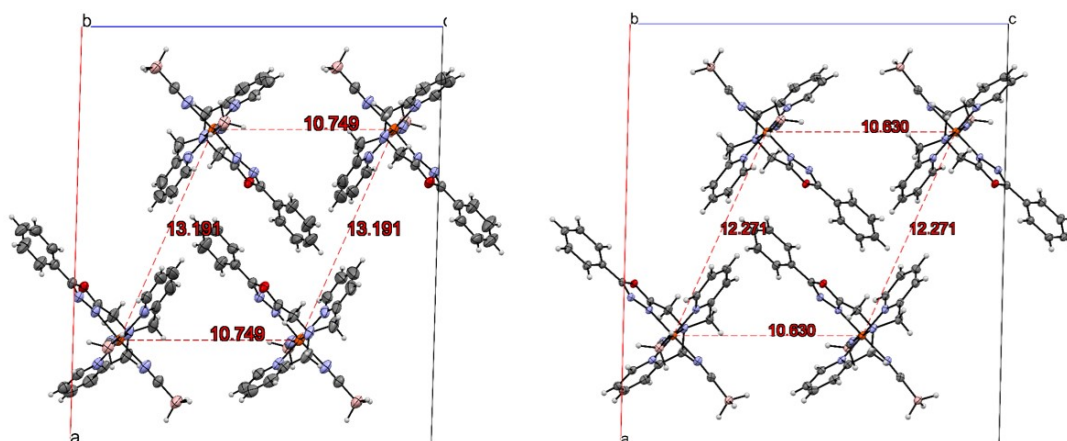

**Figure S48:** One-dimensional network of "complex dimers" in  $[\text{Fe}_2^{\text{II}}(\text{L}^{\text{TetraPh-ODA}})(\text{NCBH}_3)] \cdot 1.5 \text{H}_2\text{O}$  (C6) at 240 K (left) and 120 K (right). Unit cell changes are remarkably more pronounced along the a-axis, which corresponds to the interdimer short contacts. Red dashed lines represent intermolecular distances between iron(II) centers. Colour scheme: pink – B, dark grey – C, grey – H, violet – N, red – O, orange – Fe. ORTEP representation with atomic displacement parameters set to 50 % probability.

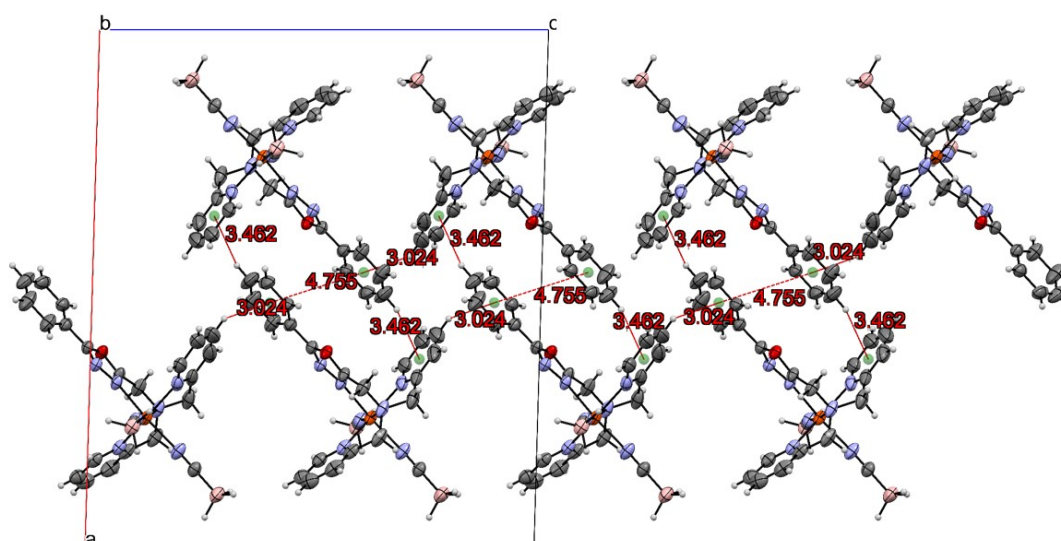

**Figure S49:** One-dimensional network of “complex dimers” in  $[\text{Fe}_2^{\text{II}}(\text{L}^{\text{TetraPh-ODA}})(\text{NCBH}_3)] \cdot 1.5 \text{H}_2\text{O}$  (**C6**). Red dashed lines represent intermolecular distances. Colour scheme: pink – B, dark grey – C, grey – H, violet – N, red – O, orange – Fe. ORTEP representation with atomic displacement parameters set to 50 % probability.

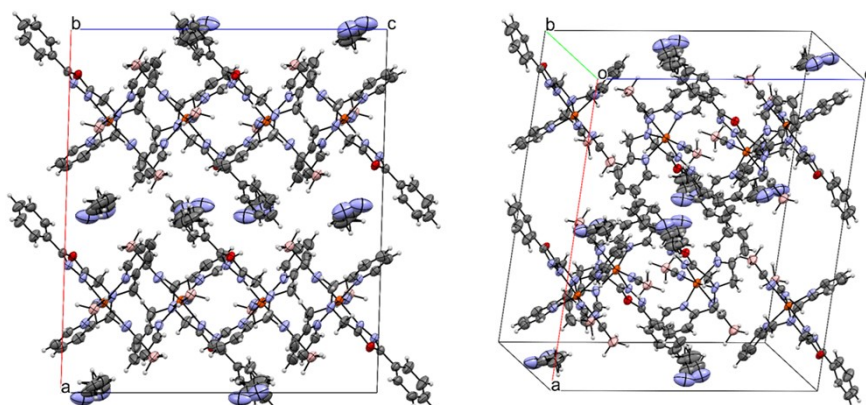

**Figure S50:** Unit cell of  $[\text{Fe}_2^{\text{II}}(\text{L}^{\text{TetraPh-ODA}})(\text{NCBH}_3)] \cdot 1.5 \text{H}_2\text{O}$  (**C6**) (240 K) with view along the b-axis (left) and perspective view (right). ORTEP representation with atomic displacement parameters set to 50 % probability.

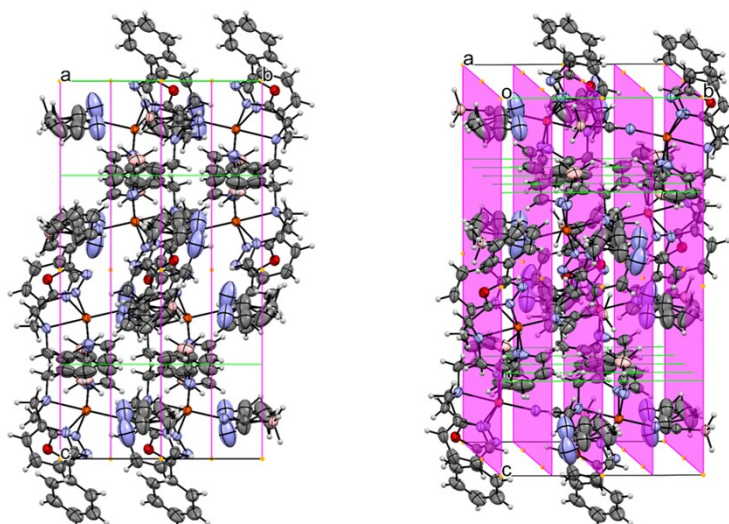

**Figure S51:** Unit cell of  $[\text{Fe}_2^{\text{II}}(\text{L}^{\text{TetraPh-ODA}})(\text{NCBH}_3)] \cdot 1.5 \text{H}_2\text{O}$  (**C6**) (240 K) with present symmetry elements with view along the a-axis (left) and perspective view (right). Centres of Inversion – yellow dots, Two-fold Axis – green lines, Mirror Glide Planes – purple planes.

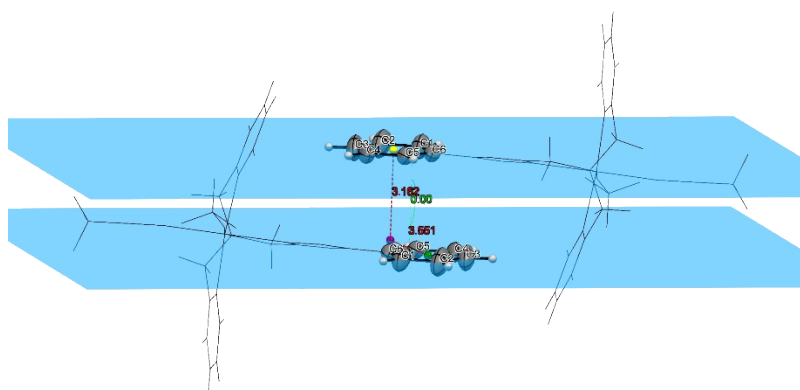

**Figure S52:**  $\pi$ - $\pi$  interaction in  $[\text{Fe}_2^{\text{II}}(\text{L}^{\text{TetraPh-ODA}})(\text{NCBH}_3)] \cdot 1.5 \text{H}_2\text{O}$  (**C6**) (240 K). Least-squares mean plane A is defined by C1, C2, C3, C4, C5 and C6. Plane B is defined by C1, C2, C3, C4, C5 and C6 of an adjacent molecule. Green point – centre of the aromatic ring in A. Yellow point – centre of the aromatic ring in B. Purple point –

orthogonal intersection of the aromatic centre in B onto plane A. Offset  $r = 3.56 \text{ \AA}$ , interplanar distance  $d_{AB} = 3.16 \text{ \AA}$ , interplanar angle  $\vartheta = 0^\circ$ . ORTEP representation with atomic displacement parameters set to 50 % probability.

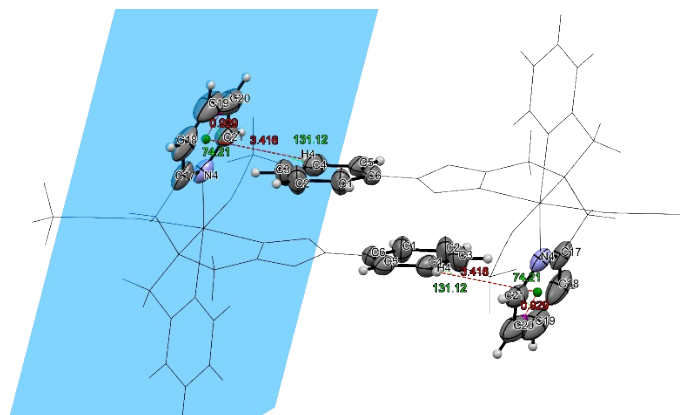

**Figure S53:** C-H ...  $\pi$  interaction in  $[\text{Fe}_2^{\text{II}}(\text{L}^{\text{TetraPh-ODA}})(\text{NCBH}_3)] \cdot 1.5 \text{ H}_2\text{O}$  (**C6**) (240 K). Least-squares plane A is defined by N4, C17, C18, C19, C20 and C21. Interacting C-H fragment is labeled as C4-H4. Green point – centre of the aromatic ring in A. Purple point – orthogonal intersection of H19 onto plane A. Offset  $r = 0.93 \text{ \AA}$ , interaction distance  $d_{\text{QH}} = 3.42 \text{ \AA}$ ,  $\alpha = 131.1^\circ$  and  $\beta = 74.2^\circ$ . ORTEP representation with atomic displacement parameters set to 50 % probability.

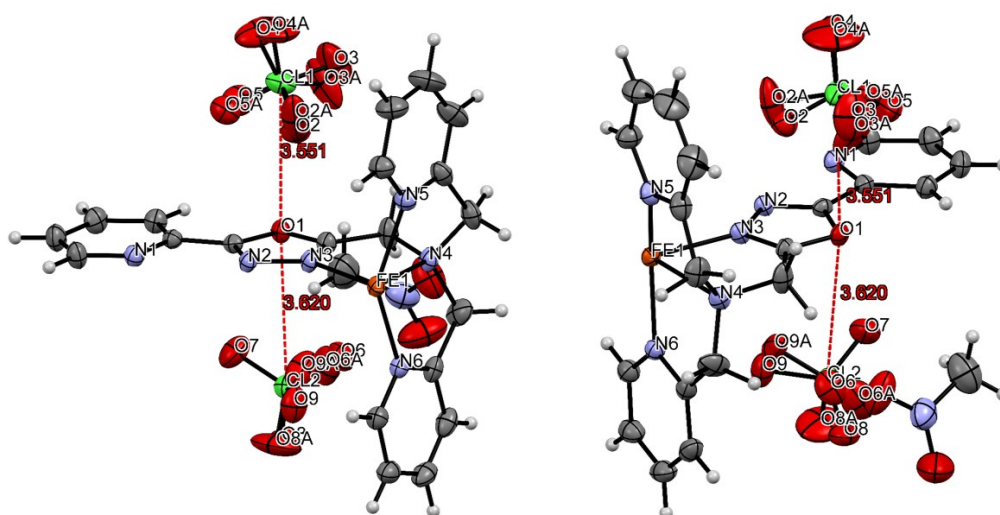

**Figure S54:** Asymmetric Unit of  $[\text{Fe}_2^{\text{II}}(\text{L}^{\text{TetraPy}})](\text{ClO}_4)_4 \cdot \text{CH}_3\text{NO}_2 \cdot 1.5 \text{ H}_2\text{O}$  (**C6**) with different views. One perchlorate anion (Cl2O4) shows rotational disorder around its Cl2-O7 axis. The other perchlorate molecule (Cl1O4) exhibits disorder of its oxygen atoms between two positions in close proximity. ORTEP representation with atomic displacement parameters set to 50 % probability.

#### 4. Cyclic Voltammetry:

To investigate the redox property of complex **C7**, cyclic voltammetry measurements were carried out in a TSC 1600 closed cell with an already built in platinum counter electrode as a vessel wall from rhd instruments. The working electrode was a glassy carbon electrode, which was polished before use with an aluminium oxide polishing paste with grain sizes of  $0.1 \text{ }\mu\text{m}$  FOR 30 minutes and  $0.05 \text{ }\mu\text{m}$  for an additional 20 minutes from Buehler on a

microfiber cloth. The electrodes were then washed with deionised water and acetonitrile and dried overnight at 60 °C. For reference all the potentials are referred to Fc/Fc<sup>+</sup> by carrying out ferrocene run at the end. The conducting salt used was 0.1 M tetrabutylammonium hexafluorophosphate. The electrochemical property of complex **C7** was analysed in acetonitrile. The complex exhibits a single Fe(II)/Fe(III) redox event at  $E_m = 0.8$  V *versus* Fc<sup>+</sup>/Fc, consistent with there being only one Fe(II) environment in these di-nuclear complex.

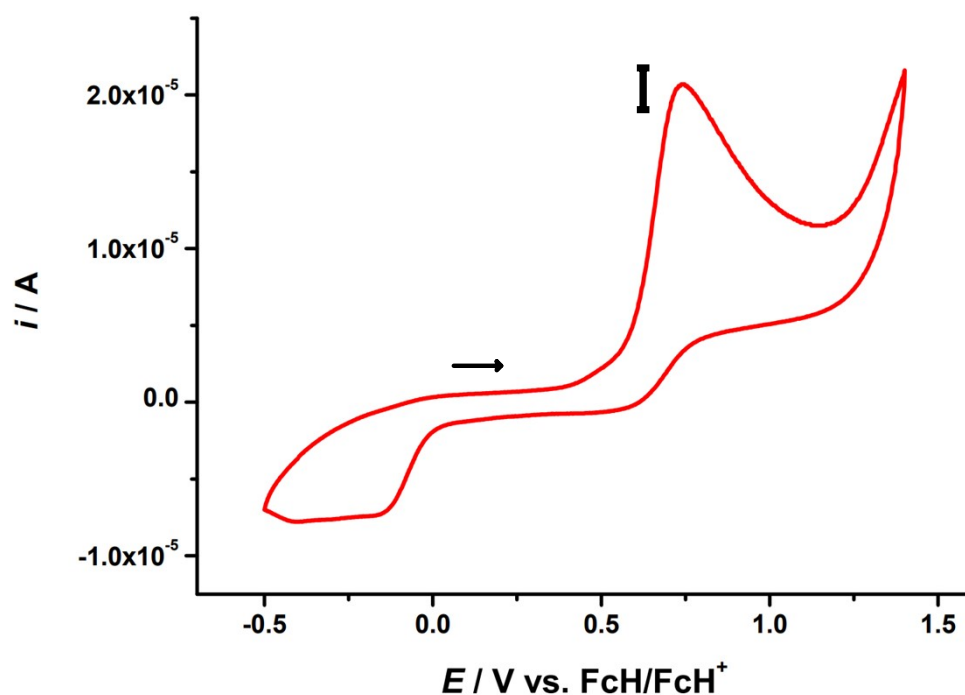

**Figure S55:** Cyclic voltammogram of  $[\text{Fe}_2^{\text{II}}(\text{L}^{\text{TetraPy}})](\text{ClO}_4)_4 \cdot \text{CH}_3\text{NO}_2 \cdot 1.5 \text{ H}_2\text{O}$  (**C6**) in 1mM solution of in MeCN (0.1 mol L<sup>-1</sup> TBAPF6 *versus* Fc<sup>+</sup>/Fc) at 100 mV s<sup>-1</sup>.

## 5. Solid-State Magnetic Data:

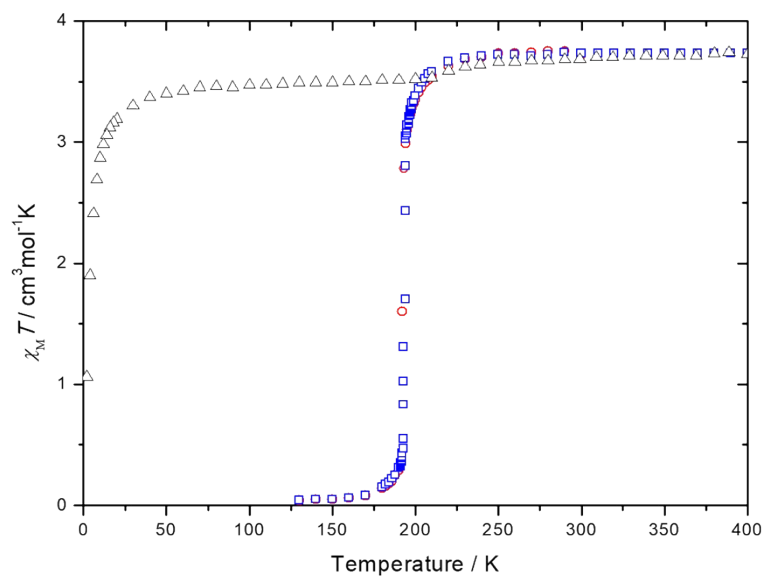

**Figure S56:** Temperature dependent magnetic behaviour of single crystals of  $[\text{Fe}_2^{\text{II}}(\text{L}^{\text{TetraPh-ODA}})(\text{NCBH}_3)] \cdot \text{X MeCN}$  (**C6**) in the form of a  $\chi_M T$  vs.  $T$  plot. Measurement was done from 300-130 K (red open circles), 130-400 K (blue open squares) and 400-2 K (black open triangles).

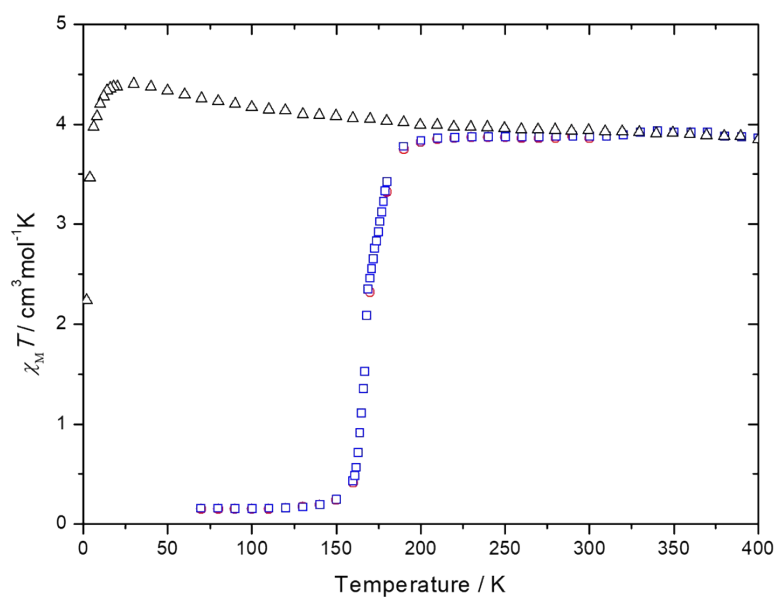

**Figure S57:** Temperature dependent magnetic behaviour of single crystals of  $[\text{Fe}_2^{\text{II}}(\text{L}^{\text{TetraPy-ODA}})(\text{NCBH}_3)] \cdot \text{X MeCN}$  (**C3**) in mother liquor in the form of a  $\chi_M T$  vs.  $T$  plot. Measurement was done from 300-70 K (red open circles), 70-400 K (blue open squares) and 400-2 K (black open triangles).

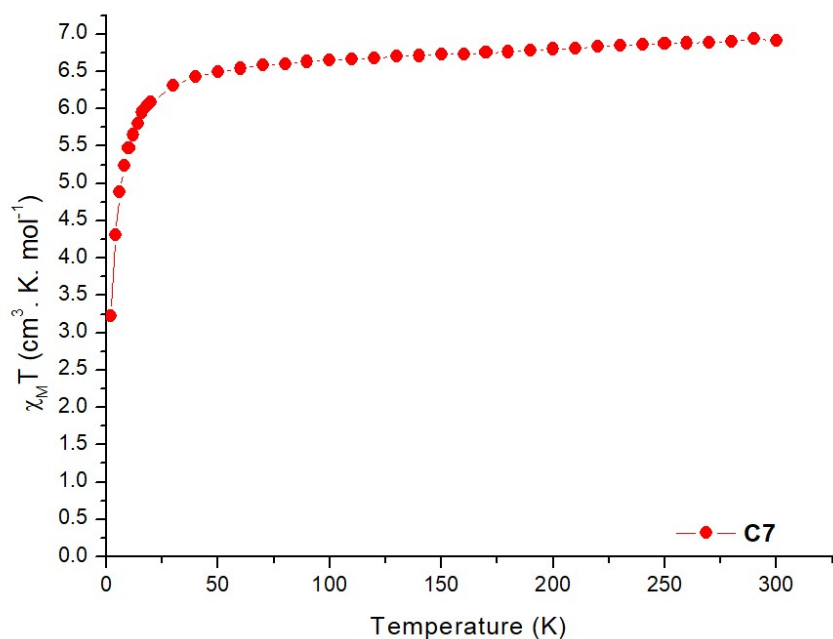

**Figure S58:**  $\chi_M T$  vs T for complexes **C7**. The dots are the data points, and the line is just guide for the eye.

## 6. Computational details:

**Table S6:** The B3LYP computed structural parameters along with the X-ray parameters for complexes **C1-C6**.

| Structural parameter | <b>C1</b> |       |       | Structural parameter | <b>C2</b> |       |       | Structural parameter | <b>C3</b> |       |       |
|----------------------|-----------|-------|-------|----------------------|-----------|-------|-------|----------------------|-----------|-------|-------|
|                      | EXP       | HS    | LS    |                      | EXP       | HS    | LS    |                      | EXP       | HS    | LS    |
| Fe-N1                | 2.227     | 2.125 | 1.990 | Fe-N3                | 2.204     | 2.140 | 2.204 | Fe-N1                | 2.217     | 2.119 | 1.976 |
| Fe-N4                | 2.295     | 2.362 | 2.077 | Fe-N4                | 2.311     | 2.374 | 2.311 | Fe-N4                | 2.281     | 2.353 | 2.080 |
| Fe-N5                | 2.220     | 2.163 | 2.021 | Fe-N5                | 2.170     | 2.166 | 2.170 | Fe-N5                | 2.163     | 2.150 | 2.032 |
| Fe-N6                | 2.204     | 2.211 | 1.842 | Fe-N6                | 2.176     | 2.166 | 2.176 | Fe-N6                | 2.173     | 2.150 | 2.032 |
| Fe-N7                | 2.101     | 2.163 | 2.021 | Fe-N7                | 2.062     | 1.913 | 2.062 | Fe-N7                | 2.071     | 1.911 | 1.914 |
| Fe-N8                | 2.030     | 1.875 | 1.834 | Fe-N8                | 2.105     | 2.244 | 2.105 | Fe-N8                | 2.137     | 2.184 | 1.980 |
| Angle N6-Fe-N8       | 97.94     | 96.82 | 97.76 | Angle N7-Fe-N8       | 95.41     | 94.47 | 95.82 | Angle N7-Fe-N8       | 92.97     | 92.36 | 90.38 |
| Structural parameter | <b>C4</b> |       |       | Structural parameter | <b>C5</b> |       |       | Structural parameter | <b>C6</b> |       |       |
|                      | EXP       | HS    | LS    |                      | EXP       | HS    | LS    |                      | EXP       | HS    | LS    |
| Fe-N2                | 2.184     | 2.147 | 1.985 | Fe-N2                | 2.171     | 2.137 | 1.982 | Fe-N2                | 1.965     | 1.995 | 1.974 |
| Fe-N3                | 2.303     | 2.383 | 2.078 | Fe-N3                | 2.294     | 2.376 | 2.075 | Fe-N3                | 2.035     | 2.347 | 2.079 |
| Fe-N4                | 2.210     | 2.165 | 2.019 | Fe-N4                | 2.207     | 2.166 | 2.023 | Fe-N5                | 1.970     | 2.062 | 2.032 |
| Fe-N5                | 2.217     | 2.165 | 2.022 | Fe-N5                | 2.205     | 2.166 | 2.021 | Fe-N6                | 1.936     | 2.075 | 1.920 |
| Fe-N6                | 2.058     | 1.876 | 1.839 | Fe-N6                | 2.065     | 1.913 | 1.858 | Fe-N7                | 1.952     | 2.347 | 1.979 |
| Fe-N7                | 2.095     | 2.193 | 1.848 | Fe-N7                | 2.091     | 2.243 | 1.868 | Fe-N8                | 1.967     | 2.061 | 2.032 |
| Angle N7-Fe-N6       | 96.34     | 92.46 | 98.21 | Angle N6-Fe-N7       | 95.03     | 94.38 | 95.41 | Angle N6-Fe-N7       | 89.85     | 93.70 | 89.73 |

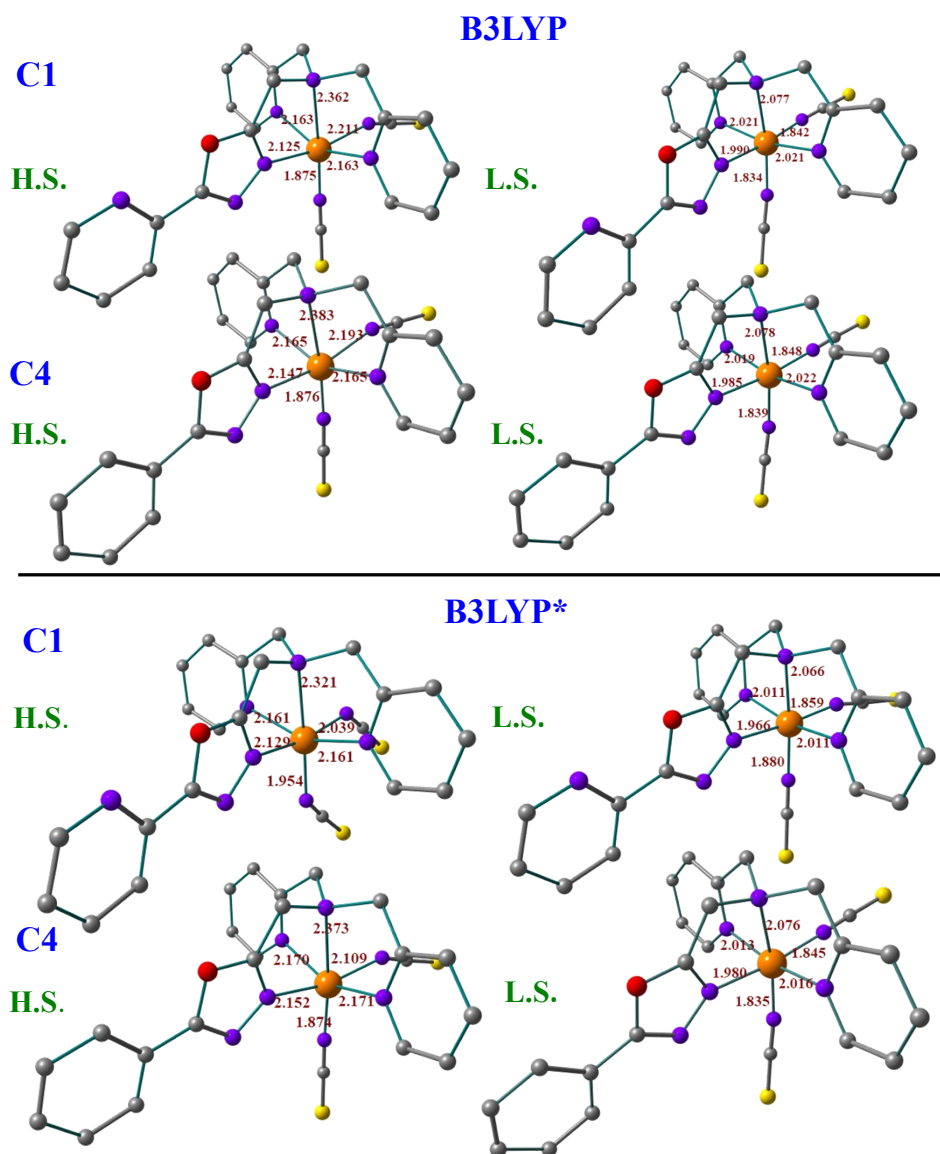

**Figure S59:** Optimized structure with B3LYP & B3LYP\* hybrid functional along with some selected bond parameters for complexes **C1** and **C4**. Colour code: Orange = Fe (Iron), Purple = N (Nitrogen), Red = O (Oxygen), Grey = C (Carbon), Pale yellow = S (Sulfur) and hydrogen atoms are omitted for clarity.

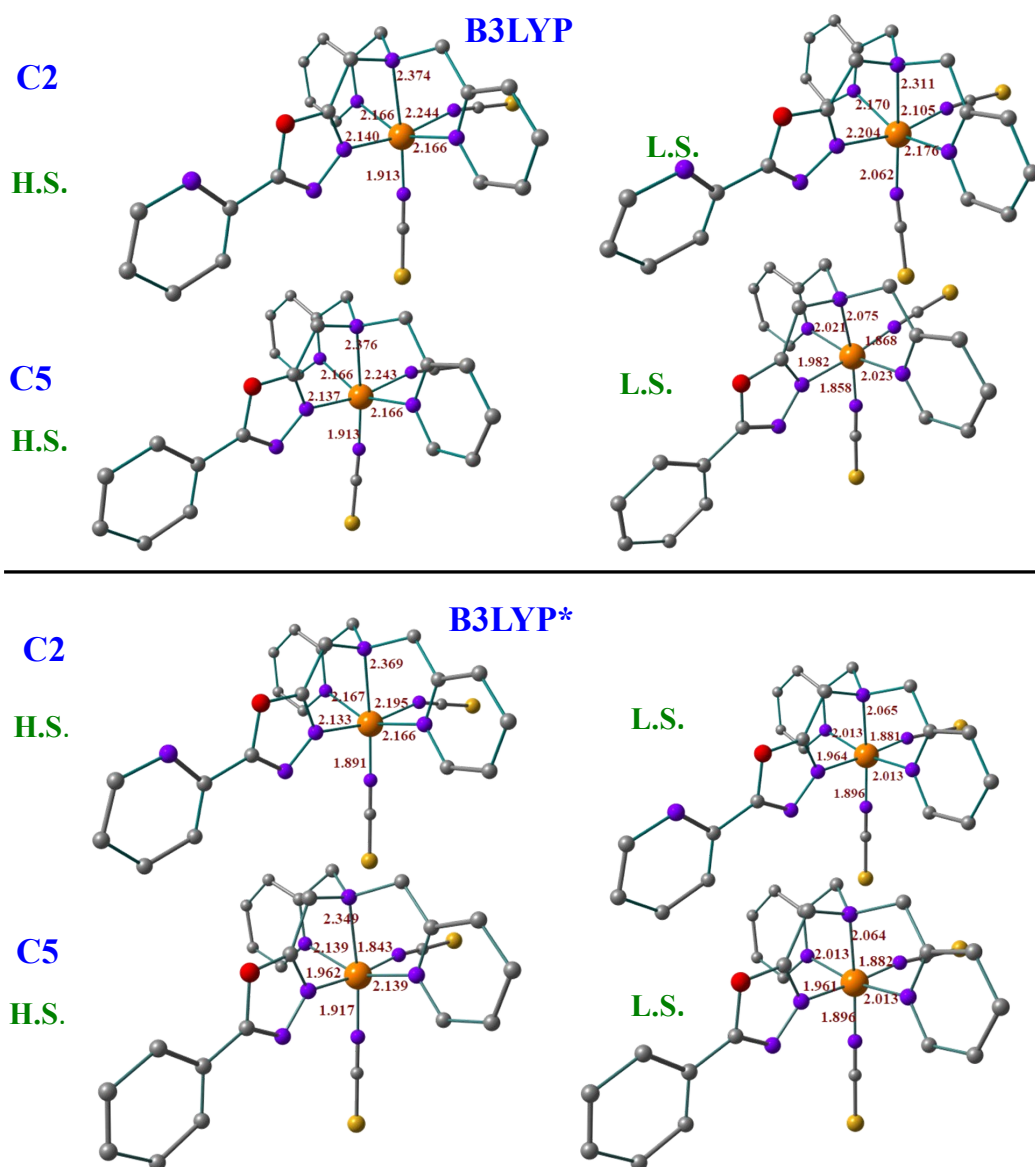

**Figure S60:** Optimized structure with B3LYP & B3LYP\* hybrid functional along with some selected bond parameters for complexes **C2** and **C5**. Colour code: Orange = Fe (Iron), Purple = N (Nitrogen), Red = O (Oxygen), Grey = C (Carbon), Yellow = Se (Selenium), and hydrogen atoms are omitted for clarity.

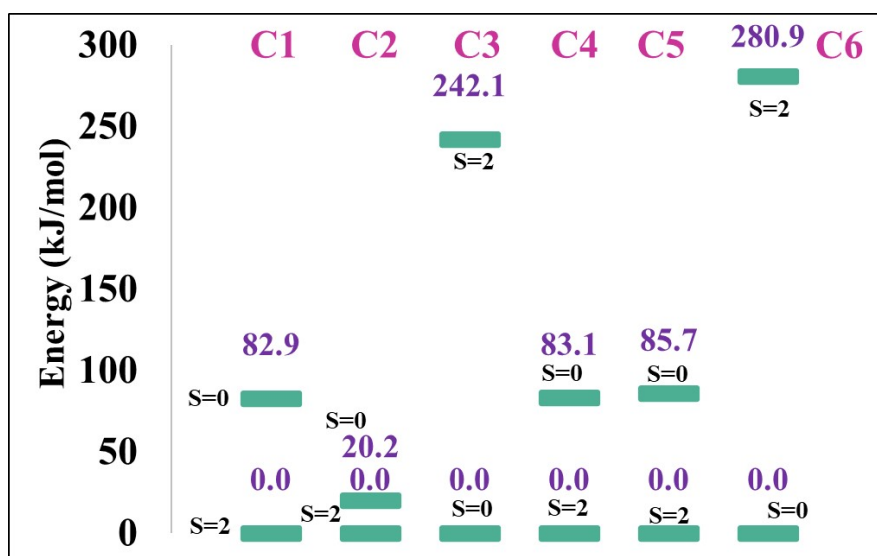

**Figure S61:** Energy difference in kJ/mol between two spin states computed with B3LYP for all six complexes.

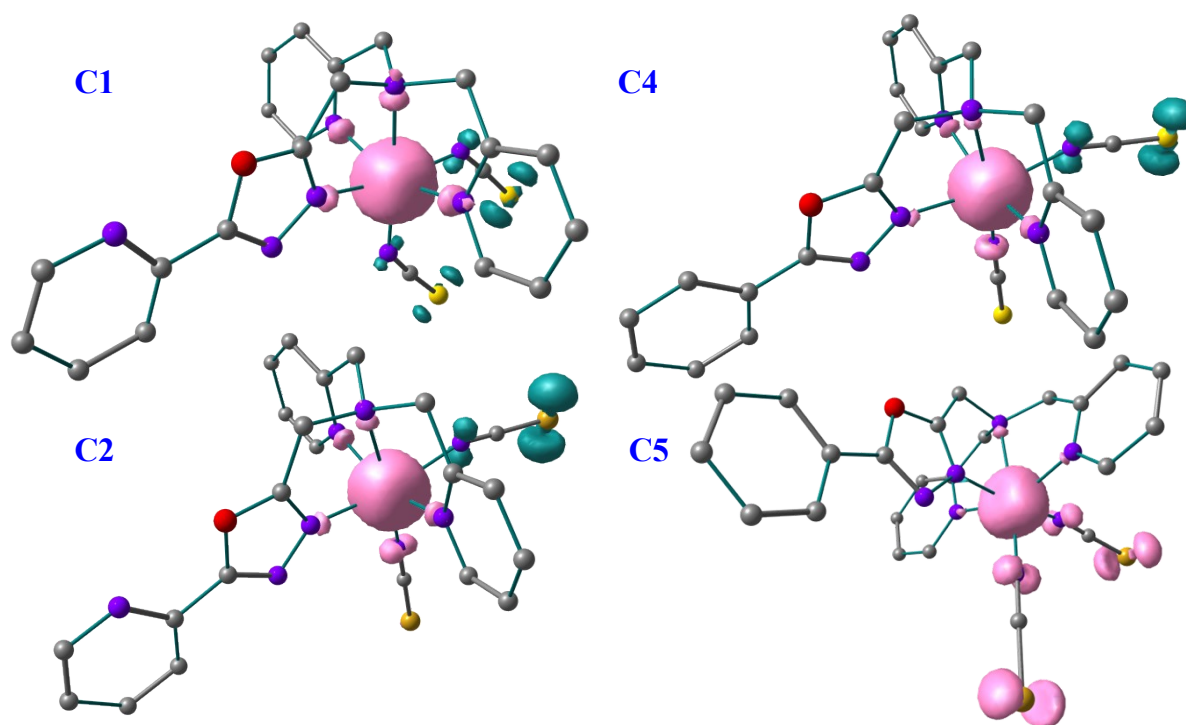

**Figure S62:** Spin density diagram for complex **C1**, **C2**, **C4**, and **C5** in High Spin state with B3LYP\* optimized geometry.

## 7. References:

1. Alvarez, S.; Alemany, P.; Casanova, D.; Cirera, J.; Llunell, M.; Avnir, D. Continuous symmetry measures: A new tool in quantum chemistry. *Coord. Chem. Rev.* **2005**, *249*, 1693–1708.
